# Supplementary material for: Exploring the Relationship between Severity of Intervertebral Disc Degeneration and Dyslipidemia: A Deep Learning Approach
Source: Research Square preprint supplement (doi:10.21203/rs.3.rs-6250034/v1), 2025-05-13
Supplement: Supplementary file 1 [file c01488558fce3d0810ea6290.xlsx]

## Sheet: 总表
Registration number	Gender	Age	Height	Weight	BMI Index	LI/2	L2/3	L3/4	L4/5	L5/S1	Average degeneration score	High - density lipoprotein (HDL)	Low - density lipoprotein (LDL)	Lipoprotein(a) [Lp(a)]	Cholesterol	Triglyceride (TG)	Apolipoprotein A1 (ApoA1)	Apolipoprotein B (ApoB)	Apo B/Apo A1	Apolipoprotein E	Glucose	Length of hospital stay	Cost	费用	久坐	舒张压	收缩压	脉率	婚姻状况
202335344	Male	46	167	70	25.0995	1	1	2	3	4	2.2	1.76	2.94	203.2	5.29	1.351	1.58	0.89	0.563291	5.26	203.2	5.24	7	5638.2	0
202328143	Male	41	173	103	34.4148	2	2	2	2	3	2.2	0.97	4.06	235.4	5.33	1.650	1.10	1.19	1.08182	3.06	235.4	4.07	8	7642.43	0	99	157	85
202327170	Male	58	165	72	26.4463	2	2	2	2	3	2.2	1.37	3.58	124.0	5.30	2.165	1.42	1.05	0.739437	3.41	124.0	4.45	9	24433.7	0	78	126	66
202334888	Male	41	180	85	26.2346	1	1	3	3	4	2.4	0.95	2.24	187.8	4.12	2.367	1.07	0.60	0.560748	8.45	187.8	4.78	9	7675.34	0
202334467	Female	71	156	65	26.7094	4	4	4	4	4	2.4	0.97	1.99	134.8	3.49	2.727	1.24	0.72	0.580645	3.19	134.8	3.98	16	11045.1	0
202334126	Female	35	158	42	16.8242	2	2	2	3	3	2.4	1.07	1.74	463.7	3.22	1.089	1.21	0.56	0.46281	3.48	463.7	4.41	8	7742.38	0
202333979	Female	57	155	56	23.3091	2	1	2	3	4	2.4	1.25	3.42	40.2	5.01	1.702	1.32	1.13	0.856061	4.50	40.2	5.06	10	11802.6	0
202332437	Male	46	174	82	27.0842	2	2	2	3	3	2.4	0.99	3.15	453.2	4.53	2.482	1.05	1.15	1.09524	4.20	453.2	4.65	12	10407.5	1
202332074	Female	53	160	55	21.4844	2	2	3	2	3	2.4	1.15	3.24	47.7	4.67	1.745	1.24	0.97	0.782258	2.94	47.7	4.45	7	14420	0
202330406	Female	45	166	63	22.8625	2	2	1	3	4	2.4	1.47	3.07	95.3	4.99	0.973	1.42	0.89	0.626761	3.49	95.3	4.57	7	7511.31	0
202329488	Female	54	152	62	26.8352	2	2	2	3	3	2.4	1.52	4.36	441.5	6.47	1.781	1.39	1.37	0.985612	4.10	441.5	4.97	11	10176.6	0
202328828	Female	28	169	124	43.4158	2	2	2	2	4	2.4	1.10	3.41	100.8	4.78	1.081	1.22	1.02	0.836066	2.89	100.8	4.83	7	7279.27	0	89	134	99
202328521	Male	60	180	85	26.2346	2	3	2	3	2	2.4	1.11	3.29	99.4	4.92	1.836	1.13	1.06	0.938053	4.77	99.4	5.28	5	7332.05	0	70	136	95
202326925	Male	62	170	69	23.8754	2	2	3	3	2	2.4	1.20	3.01	680.2	4.63	1.275	1.22	0.90	0.737705	3.53	680.2	NORMAL	8	13221.8	0	82	130	79
202326732	Female	59	165	65	23.8751	3	2	2	3	2	2.4	0.98	2.68	44.1	4.46	2.360	1.17	0.96	0.820513	4.52	44.1	4.51	8	11246.7	0	88	133	72
202326575	Male	53	175	103	33.6327	2	2	2	3	3	2.4	1.03	3.60	158.3	5.46	3.535	1.18	1.32	1.11864	5.53	158.3	8.84	5	9206.33	0	88	149	79
202311923	Female	62	158	58	23.2335	2	2	3	2	3	2.4	1.03	2.50	106.4	4.40	2.89	1.36	1.19	0.875	4.24	106.4	4.98	5	8360.36	0	88	142	73
202334466	Male	32	171	74	25.3069	3	3	3	4	5	2.5	0.93	2.52	196.6	3.77	1.246	1.05	0.76	0.72381	3.48	196.6	4.49	9	8915.82	1
202333800	Female	52	155	65	27.0552	3	3	4	3	4	2.6	1.69	4.16	299.6	6.16	0.730	1.56	1.21	0.775641	4.20	299.6	4.99	11	10318.6	0
202333461	Male	53	182	80	24.1517	2	2	3	3	3	2.6	1.11	3.39	92.9	5.14	0.918	1.17	1.04	0.888889	2.57	92.9	5.17	8	7949.72	0
202333358	Male	64	171	85	29.0688	3	3	3	2	2	2.6	1.19	3.99	304.4	5.58	1.638	1.23	1.33	1.0813	3.63	304.4	4.63	6	6821.46	0
202333004	Male	49	165	60	22.0386	2	2	3	3	3	2.6	1.46	4.23	408.7	6.14	0.750	1.39	1.33	0.956835	3.00	408.7	5.01	8	10444.5	0
202332717	Female	59	160	60	23.4375	2	2	3	3	3	2.6	1.86	3.90	331.5	6.29	1.240	1.56	1.19	0.762821	5.17	331.5	4.41	9	7720.08	0
202331677	Female	62	160	70	27.3438	2	2	3	3	3	2.6	1.18	2.69	26.9	4.39	2.519	1.38	1.01	0.731884	3.79	26.9	7.66	9	20625.9	0
202331556	Male	50	170	61	21.1073	2	3	3	3	2	2.6	1.04	2.74	80.5	4.08	0.933	1.07	0.79	0.738318	4.87	80.5	5.51	11	8590.23	0
202330848	Male	36	180	112	34.5679	2	2	3	3	3	2.6	1.18	4.23	99.3	5.86	2.200	1.11	1.54	1.38739	4.71	99.3	4.56	10	9740.87	0
202329301	Male	52	175	75	24.4898	2	2	3	3	3	2.6	1.10	2.88	15.2	4.68	2.729	1.23	1.02	0.829268	3.59	15.2	4.57	6	6814.65	1	87	124	86
202328551	Female	49	148	52.5	23.9682	3	3	2	2	3	2.6	1.61	2.11	39.0	4.13	0.799	1.45	0.58	0.4	3.59	39.0	4.09	6	12052.1	0	61	96	58
202327910	Female	38	160	80	31.25	2	2	3	2	4	2.6	1.59	4.87	346.8	7.23	3.234	1.33	1.70	1.2782	8.40	346.8	9.61	11	9616.37	0	109	182	99
202327057	Male	49	165	61	22.4059	2	2	2	3	4	2.6	1.12	2.40	26.1	3.75	0.843	1.17	0.66	0.564103	2.58	26.1	4.48	9	8655.73	0	80	113	66
202327051	Female	55	163	61	22.9591	2	3	3	3	2	2.6	0.93	3.32	261.5	4.66	2.380	1.02	1.01	0.990196	3.98	261.5	4.79	7	14407.6	0	86	146	90
202224898	Male	63	无			1	2	2	3	5	2.6	1.03	2.04	32.5	3.96	1.47	1.13	0.62	0.548673	8.45	32.5	3.98	3	5412.93	0	86	132	80
202335103	Male	60	170	65	22.4913	3	3	2	2	4	2.8	1.46	2.54	70.5	4.36	0.942	1.43	0.71	0.496503	3.89	70.5	4.32	7	10721.1	0
202332652	Female	57	160	65	25.3906	2	2	3	4	3	2.8	1.29	3.26	100.9	4.93	1.340	1.30	0.91	0.7	4.43	100.9	4.40	7	9077.2	0
202332412	Male	52	180	80	24.6914	2	3	3	3	3	2.8	1.25	3.37	51.8	5.29	2.781	1.34	1.20	0.895522	4.68	51.8	5.75	8	8427.22	0
202332200	Male	58	178	91	28.7211	3	3	2	3	3	2.8	0.96	3.03	82.9	4.78	5.636	1.33	1.10	0.827068	4.67	82.9	5.86	15	11560.4	0
202331971	Female	60	158	67	26.8386	3	3	3	3	2	2.8	1.15	3.46	105.6	5.12	1.301	1.26	1.04	0.825397	5.39	105.6	5.43	10	14289.3	0
202331145	Female	61	160	60	23.4375	2	3	3	3	3	2.8	1.00	2.22	270.7	3.73	2.235	1.28	0.79	0.617188	3.94	270.7	4.40	8	10473.8	0
202330838	Female	42			#DIV/0!	3	2	3	3	3	2.8	1.01	1.90	126.1	3.19	0.748	1.18	0.56	0.474576	2.65	126.1	4.19	8	6446.91	0
202330375	Female	54	163	67	25.2174	3	3	3	3	2	2.8	1.23	2.66	35.9	4.34	2.607	1.43	0.77	0.538462	2.96	35.9	4.52	8	9964.27	0
202329413	Female	48	160	70	27.3438	2	2	3	3	4	2.8	1.39	2.65	490.7	4.40	1.064	1.47	0.71	0.482993	4.45	490.7	4.64	5	11141.1	0		128	74
202329368	Female	56	158	72	28.8415	3	3	3	2	3	2.8	1.54	2.68	55.3	4.61	1.546	1.75	0.70	0.4	3.50	55.3	5.89	7	12766.3	0	84	142	94
202328435	Female	59	168	52	18.424	3	4	4		3	2.8	1.05	1.65	580.8	3.01	1.090	1.18	0.52	0.440678	3.75	580.8	4.08	5	8036.05	0	68	108	75
202328126	Male	68	175	72.5	23.6735	3	3	3	2	3	2.8	1.38	2.36	162.7	3.91	1.109	1.47	0.71	0.482993	2.61	162.7	4.62	14	25147.8	0	70	120	80
202327060	Female	40	162	52	19.8141	2	2	3	3	4	2.8	1.25	2.67	185.0	4.20	0.786	1.14	0.66	0.578947	3.37	185.0	4.34	9	8649.89	0	73	99	78
202326974	Male	75	170	65	22.4913	3	3	3	3	2	2.8	1.17	2.70	60.5	4.24	1.360	1.22	0.82	0.672131	3.06	60.5	5.80	13	17249.3	0	77	117	63
202326880	Male	73	166	58	21.048	3	2	2	3	4	2.8	1.63	2.58	242.5	4.62	0.697	1.47	0.69	0.469388	4.75	242.5	4.14	8	8470.31	0	80	120	74
202326780	Female	65	155	55	22.8928	3	3	3	3	2	2.8	1.93	5.12	56.1	7.47	1.631	1.49	1.65	1.10738	4.19	56.1	4.65	7	16374.4	0	86	135	69
202326737	Male	35	178	85	26.8274	3	3	3	3	2	2.8	0.92	2.52	60.7	3.66	1.104	1.05	0.70	0.666667	3.09	60.7	4.51	10	14138.9	0		146	87
202326379	Male	60	164	72	26.7698	2	3	3	3	3	2.8	1.05	3.21	83.7	4.54	1.401	1.15	0.92	0.8	3.40	83.7	6.06	14	13617.6	0	99	152	76
202335236	Female	51	160	53	20.7031	2	2	3	3	5	3	1.21	3.16	193.2	4.92	1.386	1.16	0.96	0.827586	6.08	193.2	4.67	9	9043.46	0
202335064	Female	72	158	69	27.6398	3	3	3	3	3	3	1.19	2.00	45.5	3.52	1.251	1.37	0.59	0.430657	3.82	45.5	6.66	10	10449.8	0
202333456	Female	57	169	70	24.5089	3	3	4	3	2	3	1.17	3.16	306.0	5.16	1.884	1.27	1.16	0.913386	4.08	306.0	4.97	24	15288.3	0
202333354	Female	59	155	50	20.8117	3	3	3	3	3	3	1.01	2.38	387.3	3.98	1.202	1.11	0.77	0.693694	2.78	387.3	4.87	7	11929.8	0
202333347	Male	76	162	50	19.052	3	3	3	3	3	3	0.92	3.48	1154.6	4.86	0.811	0.92	1.13	1.22826	3.10	1154.6	4.47	3	4179.34	1
202333002	Female	72	165	62	22.7732	3	3	3	3	3	3	1.10	1.63	107.0	3.61	2.427	1.35	0.54	0.4	4.64	107.0	4.74	9	6802.59	0
202333000	Male	66	168	82	29.0533	3	3	3	3	3	3	0.87	1.98	31.8	3.23	1.299	1.01	0.63	0.623762	2.22	31.8	5.29	8	9490.97	0
202332394	Male	65	174	75	24.7721	3	3	3	3	3	3	1.22	3.78	88.3	5.34	1.514	1.22	1.24	1.01639	4.22	88.3	NORMAL	6	8564.43	0
202332225	Male	44	180	90	27.7778	2	2	3	4	4	3	0.97	2.92	282.2	4.33	1.613	1.13	0.88	0.778761	3.79	282.2	6.17	4	8080.5	0
202332199	Male	42	178	66	20.8307	3	2	3	3	4	3	1.11	3.24	234.0	4.81	2.069	1.18	1.01	0.855932	3.60	234.0	4.50	6	7430.57	0
202332043	Female	69	157	60	24.3418	3	3	3	3	3	3	1.00	3.33	113.9	4.70	1.227	1.32	1.03	0.780303	3.08	113.9	5.00	7	17247.7	0
202331829	Male	66	164	60	22.3081	3	3	3	3	3	3	1.11	2.87	182.6	4.33	1.549	1.24	0.93	0.75	3.71	182.6	5.26	6	7451.8	0
202331640	Male	58	170	65	22.4913	5	4	4	5	5	3	1.18	3.21	58.1	4.83	2.356	1.32	1.12	0.848485	4.38	58.1	4.76	5	7285.45	0
202331276	Female	58	156	60	24.6548	2	3	3	3	4	3	1.29	4.44	131.4	6.37	1.614	1.27	1.47	1.15748	4.21	131.4	4.94	5	8094.75	0
202331245	Female	55	166	65	23.5883	2	3	3	3	4	3	1.53	2.89	48.2	4.87	0.552	1.48	0.78	0.527027	3.67	48.2	4.72	7	9782.9	0
202331122	Male	53	174	65	21.4692	3	3	3	3	3	3	0.83	1.72	58.8	3.73	4.427	1.18	0.76	0.644068	4.24	58.8	5.01	9	9647.47	1
202330823	Male	78	164	75	27.8852	2	3	3	3	4	3	0.86	1.80	192.2	3.13	2.562	1.19	0.64	0.537815	3.76	192.2	4.63	10	10092.8	0
202330160	Female	66	157	60	24.3418	3	3	3	3	3	3	1.25	3.25	316.2	4.87	1.017	1.33	0.96	0.721805	3.93	316.2	4.44	8	11143.5	0
202329744	Male	51	178	64	20.1995	2	3	3	3	4	3	1.67	4.88	230.3	7.10	1.708	1.45	1.48	1.02069	3.99	230.3	NORMAL	6	11773.1	0
202329703	Female	45	153	55	23.4952	3	3	3	3	3	3	1.39	2.69	98.1	4.49	0.817	1.38	0.76	0.550725	4.51	98.1	4.43	7	9204.98	0
202329659	Male	66	173	74	24.7252	3	3	3	3	3	3	1.01	3.84	218.0	5.30	1.929	1.08	1.33	1.23148	3.13	218.0	19.96	11	14419.7	0
202329220	Male	62	173	83	27.7323	3	3	3	3	3	3	1.14	2.69	114.8	4.07	1.576	1.33	0.84	0.631579	2.74	114.8	5.58	8	8859.46	0	86	146	86
202328823	Female	68	158	56	22.4323	3	3	3	3	3	3	1.21	4.10	331.8	5.90	2.052	1.28	1.41	1.10156	4.65	331.8	7.96	9	15536.4	0		146	83
202328816	Male	55	162	65	24.7676	2	3	3	3	4	3	1.08	2.05	53.6	3.38	1.048	1.22	0.62	0.508197	2.74	53.6	4.59	11	11547.5	0	87	134	63
202328577	Male	79	178	75	23.6713	3	3	3	3	3	3	0.80	1.41	575.6	2.34	0.836	1.02	0.44	0.431373	2.15	575.6	5.22	7	10599.7	0	65	140	68
202328273	Male	35	181	79	24.114	3	3	3	2	4	3	1.15	2.52	54.0	3.99	0.905	1.21	0.75	0.619835	3.03	54.0	4.39	7	12084.6	0	87	145	77
202328142	Female	72	162	65	24.7676	3	3	3	3	3	3	0.71	2.22	124.8	3.12	0.821	0.95	0.67	0.705263	2.96	124.8	NORMAL	10	9784.78	0	88	153	79
202327899	Female	71	153	59	25.204	3	3	3	4	2	3	1.59	3.13	153.5	4.98	0.948	1.60	0.90	0.5625	3.68	153.5	5.29	11	13104.2	0	78	129	76
202326560	Female	56	168	67	23.7387	2	3	3	3	4	3	1.52	4.78	561.9	7.04	1.475	1.40	1.55	1.10714	4.22	561.9	5.25	8	8177.19	0	69	105	84
202326416	Male	62	175	80	26.1224	2	2	3	4	4	3	1.15	2.63	133.4	4.07	0.821	1.27	0.75	0.590551	2.32	133.4	4.19	4	8166.28	0	75	121	57
202316424	Female	71	157	58	23.5304	3	3	3	3	3	3	1.26	3.06	153.2	5.10	1.71	1.44	1.08	0.75	4.63	153.2	4.84	9	12286.1	0	83	135	76
202335396	Male	50	180	85	26.2346	3	3	3	4	3	3.2	0.87	2.56	739.1	4.16	2.16	1.13	1.08	0.955752	3.17	739.1	NORMAL	3	9119.33	0	85	126	75
202333441	Female	67	162	60	22.8624	3	3	4	4	2	3.2	1.32	2.00	141.3	3.85	1.173	1.42	0.58	0.408451	4.07	141.3	3.79	8	10322.5	0
202333158	Female	79	160	70	27.3438	3	3	3	3	4	3.2	1.32	2.33	1097.3	4.26	0.664	1.31	0.63	0.480916	4.04	1097.3	4.94	4	8246.93	1
202333099	Female	61	160	65	25.3906	3	3	3	3	4	3.2	1.28	2.10	244.0	4.11	2.745	1.40	0.73	0.521429	2.67	244.0	4.50	9	13658.6	0
202332500	Female	70	150	60	26.6667	3	3	3	4	3	3.2	0.87	2.01	127.1	3.21	1.315	1.06	0.64	0.603774	5.34	127.1	5.39	5	9276.81	0
202332496	Female	73	160	57	22.2656	3	3	4	3	3	3.2	1.18	2.72	130.0	4.74	2.658	1.29	1.12	0.868217	5.73	130.0	4.75	8	12756.5	0
202332392	Male	64	175	72	23.5102	3	3	3	3	4	3.2	0.86	3.20	110.7	4.43	1.630	0.95	1.07	1.12632	3.06	110.7	4.91	7	9312.22	0
202331244	Male	64	168	62	21.9671	4	3	3	3	3	3.2	1.00	2.40	53.5	4.29	2.696	1.17	0.92	0.786325	5.12	53.5	6.40	7	11677.2	0
202330747	Female	74	162	68	25.9107	3	3	4	3	3	3.2	1.54	2.98	300.5	5.00	1.821	1.50	0.89	0.593333	4.61	300.5	5.15	8	8591.35	0
202330578	Female	74	156	73	29.9967	4	4	4	4	4	3.2	1.15	2.53	44.9	4.41	1.977	1.30	0.81	0.623077	5.73	44.9	4.96	11	11309.1	0
202330573	Female	42	154	54	22.7694	3	3	3	4	2	3.2	1.98	1.84	23.7	4.43	0.611	1.65	0.53	0.321212	5.53	23.7	4.38	5	8271.18	0
202330572	Female	73	153	60	25.6312	2	3	3	3	3	3.2	0.97	2.94	85.6	4.36	1.761	1.14	0.90	0.789474	3.62	85.6	5.61	14	13122.1	0
202330360	Male	65	168	70	24.8016	3	2	4	4	3	3.2	2.01	4.90	26.3	8.07	3.719	1.81	1.77	0.977901	5.89	26.3	7.13	6	7297.08	1
202330253	Female	50	158	55	22.0317	3	3	3	3	4	3.2	1.26	2.40	63.5	3.95	0.720	1.32	0.68	0.515152	5.04	63.5	4.93	9	12103.5	0
202330239	Female	77	163	53	19.9481	2	2	3	4	5	3.2	1.81	2.06	626.8	4.31	1.008	1.68	0.66	0.392857	4.37	626.8	4.83	8	13163.7	0
202328292	Male	78	168	65	23.03	3	4	3	3	3	3.2	1.02	3.36	812.8	4.92	1.630	1.13	1.15	1.0177	4.05	812.8	6.12	13	10853.8	0	83	150	81
202328150	Female	53	165	60	22.0386	3	3	3	3	4	3.2	1.23	2.60	62.8	4.18	1.291	1.38	0.77	0.557971	2.80	62.8	4.50	8	13769.3	0	81	125	70
202328075	Male	69	170	70	24.2215	3	2	4	4	3	3.2	1.19	2.50	254.4	3.95	0.761	1.33	0.71	0.533835	2.93	254.4	5.23	11	19464.7	0	90	150	85
202327931	Male	51	170	62	21.4533	3	3	3	4	3	3.2	0.98	3.10	395.2	4.32	0.999	1.11	0.91	0.81982	2.84	395.2	5.18	7	8844.16	0	81	139	71
202327055	Female	55	155	62	25.8065	3	3	3	3	4	3.2	1.49	3.38	81.7	5.68	2.250	1.39	1.14	0.820144	5.97	81.7	4.70	6	9103.61	0	92	143	70
202326911	Female	61	172	90	30.4218	3	3	3	4	3	3.2	1.72	5.11	201.6	7.40	1.350	1.37	1.66	1.21168	6.21	201.6	5.06	3	12527.2	0	91	156	79
202326747	Male	66	172	70	23.6614	3	3	3	4	3	3.2	1.07	2.73	64.8	4.14	2.021	1.17	0.81	0.692308	3.51	64.8	7.14	11	13003.4	0	79	121	68
202325867	Female	67	162	60	22.8624	3	3	3	3	4	3.2	1.00	3.02	586.3	4.66	2.454	1.22	1.11	0.909836	3.79	586.3	5.16	14	13383.5	0	84	153	62
202325543	Male	48	172	69.5	23.4924	3	3	3	3	4	3.2	1.03	2.46	249.0	3.80	1.112	1.23	0.75	0.609756	2.88	249.0	4.14	3	6676.18	0	82	136	75
202325332	Male	13	170	60	20.7612	3	3	3	3	4	3.2	1.42	2.97	70.2	4.78	1.537	1.35	0.76	0.562963	5.07	70.2	4.58	2	3373.29	0	86	131	78
202325193	Female	36	162	50	19.052	3	3	4	3	3	3.2	1.06	2.28	1012.8	3.63	0.700	1.04	0.62	0.596154	2.96	1012.8	4.60	12	10883.1	1	83	130	86
202318141	Female	53	149	60	27.0258	3	3	4	3	3	3.2	1.22	2.73	338.7	4.49	1.93	1.36	0.81	0.595588	4.55	338.7	4.09	15	14396.3	0	107	158	70
202312733	Male	50	180	85	26.2346	3	3	3	4	3	3.2	0.87	2.56	739.1	4.16	2.16	1.13	1.08	0.955752	3.17	739.1	NORMAL	3	9119.33	0	85	126	75
202330531	Female	61	170	68	23.5294	3	3	2	4	3	3.25	1.68	4.74	196.3	6.90	1.272	1.45	1.56	1.07586	5.68	196.3	4.58	12	11696.6	1
202330452	Female	28	160	100	39.0625	1	1	1	2	3	3.25	1.22	2.10	36.6	3.68	1.045	1.33	0.59	0.443609	6.83	36.6	5.41	13	10519.9	1
202335129	Female	50	159	53	20.9644	3	3	3	4	4	3.4	1.47	3.07	235.9	4.98	1.013	1.45	1.01	0.696552	3.50	235.9	4.58	8	5968.25	1
202334822	Female	50	164	61	22.68	3	3	4	4	3	3.4	1.46	2.58	109.6	4.37	0.610	1.38	0.68	0.492754	3.01	109.6	6.28	3	6230.34	0
202334820	Male	68	165	58	21.3039	3	3	4	4	3	3.4	0.90	3.11	102.2	4.33	1.197	1.02	1.05	1.02941	3.90	102.2	4.73	6	6460.08	0
202334284	Female	51	160	55	21.4844	3	3	3	4	4	3.4	1.82	3.90	112.1	6.06	0.832	1.55	1.04	0.670968	5.06	112.1	3.95	6	10129.7	0
202334129	Male	35	176	70	22.5981	3	3	3	5	3	3.4	1.73	1.76	51.5	3.85	0.916	1.54	0.57	0.37013	6.56	51.5	4.18	14	8416.75	1
202334119	Female	20	155	52	21.6441	3	3	3	4	4	3.4	1.12	3.41	568.4	5.13	3.489	1.18	1.19	1.00847	5.06	568.4	NORMAL	5	9896.16	0
202333779	Male	49	170	80	27.6817	3	3	3	4	4	3.4	1.15	3.17	147.1	4.80	1.527	1.24	1.01	0.814516	3.20	147.1	4.71	12	9817.82	0
202333346	Female	57	155	54	22.4766	3	4	4	3	3	3.4	1.66	4.95	347.4	7.33	1.522	1.37	1.50	1.09489	5.10	347.4	4.18	14	11547.4	0
202333180	Male	54	175	99	32.3265	3	3	4	3	4	3.4	0.83	2.55	170.8	3.96	1.580	1.03	0.84	0.815534	3.15	170.8	4.71	7	7218.95	0
202332630	Female	54	163	55	20.7008	3	4	3	3	4	3.4	1.13	4.07	103.3	6.03	2.604	1.05	1.59	1.51429	6.63	103.3	4.80	6	6544.43	0
202332579	Male	69	183	91	27.1731	3	3	3	4	4	3.4	1.06	2.50	51.8	4.02	2.567	1.34	0.82	0.61194	3.03	51.8	4.78	6	9658.03	0
202332511	Female	69	163	60	22.5827	3	4	3	3	4	3.4	1.86	2.59	59.2	4.99	1.545	2.06	0.74	0.359223	3.30	59.2	4.84	7	11140.2	0
202332296	Male	74	170	65	22.4913	3	3	4	4	3	3.4	1.13	3.35	99.7	4.93	1.591	1.24	1.09	0.879032	4.11	99.7	6.54	7	10635.1	0
202331936	Male	82	172	79	26.7036	4	3	3	3	4	3.4	0.77	2.18	48.6	3.26	1.448	1.05	0.75	0.714286	2.92	48.6	6.59	11	12757.3	0
202331846	Female	50	158	70	28.0404	3	3	3	4	4	3.4	1.03	2.13	109.9	3.50	1.766	1.22	0.71	0.581967	3.08	109.9	4.66	7	7077.14	0
202331243	Male	30	175	67	21.8776	4	3	3	3	4	3.4	1.20	3.69	17.5	5.35	1.164	1.15	1.06	0.921739	3.09	17.5	4.84	6	7950.87	0
202331066	Male	40	180	110	33.9506	3	3	3	4	4	3.4	1.07	2.97	420.7	4.50	1.046	1.19	0.91	0.764706	3.49	420.7	5.10	7	7779.41	1
202330966	Female	56	166	50	18.1449	3	3	4	4	3	3.4	1.81	2.70	93.4	5.11	1.052	1.73	0.76	0.439306	6.10	93.4	4.29	9	12757.1	1
202330792	Female	49	163	55	20.7008	2	3	4	4	4	3.4	1.09	2.05	186.3	3.46	1.274	1.25	0.63	0.504	3.07	186.3	4.08	6	8054.08	0
202330724	Female	58	160	71	27.7344	3	4	4	3	3	3.4	1.20	3.08	13.3	4.61	1.462	1.32	0.92	0.69697	3.80	13.3	4.71	5	11142.6	0
202330134	Female	71	170	82.5	28.5467	3	3	3	4	4	3.4	0.95	2.72	61.3	4.22	2.208	1.20	0.94	0.783333	4.16	61.3	4.69	8	10056.6	0
202329702	Female	47	158	70	28.0404	3	3	3	4	4	3.4	1.27	2.86	169.4	4.41	1.131	1.38	0.86	0.623188	4.34	169.4	5.70	16	11384	0
202329298	Female	67	158	80	32.0461	3	3	3	4	4	3.4	1.10	3.26	180.1	4.91	1.744	1.31	1.08	0.824427	3.46	180.1	6.18	12	9670.18	1	87	146	94
202329143	Female	74	152	55	23.8054	2	2	3	3	3	3.4	1.42	3.26	59.0	5.03	1.549	1.43	1.14	0.797203	4.67	59.0	6.51	10	12100.8	1	72	139	91
202329043	Female	80	156	65	26.7094	4	3	3	3	4	3.4	1.59	4.63	136.3	6.62	1.134	1.51	1.36	0.900662	4.10	136.3	10.83	5	12879.8	0	66	117	85
202329038	Female	27	158	80	32.0461	2	2	2	2	3	3.4	0.90	3.20	42.9	4.78	3.992	1.11	1.11	1	6.27	42.9	5.33	14	13737.5	1	84	124	89
202329032	Male	69	163	67	25.2174	3	4	5	5	5	3.4	1.19	3.54	472.8	5.09	1.240	1.22	1.18	0.967213	4.11	472.8	4.35	7	10526.1	0	69	107	60
202328982	Female	71	156	66	27.1203	4	4	4	4	5	3.4	1.05	2.85	551.4	4.33	1.325	1.24	0.81	0.653226	3.43	551.4	4.68	5	8332.05	0	71	115	71
202328973	Female	77	150	54	24	4	5	5	5	5	3.4	1.20	2.13	31.7	3.79	1.028	1.34	0.64	0.477612	2.78	31.7	2.99	10	12592.5	0	78	152	78
202328966	Female	76	157	52.5	21.299	4	3	3	4	5	3.4	1.09	2.42	65.2	3.94	1.553	1.24	0.73	0.58871	3.39	65.2	4.29	4	14477.1	0	71	114	62
202328855	Female	66	162	63	24.0055	3	3	3	3	3	3.4	1.14	3.38	22.4	4.96	1.781	1.15	1.05	0.913043	4.47	22.4	4.65	9	11595.3	0	73	128	60
202328366	Female	30	162	73	27.8159	3	3	3	4	4	3.4	1.05	3.64	206.6	4.91	1.059	1.19	1.02	0.857143	4.60	206.6	4.91	10	8029.81	0	94	143	73
202325990	Female	43	160	76	29.6875	3	3	3	4	4	3.4	0.90	2.21	212.9	3.51	1.956	1.24	0.67	0.540323	3.31	212.9	4.74	8	8574.7	0	69	127	85
202325878	Female	60	158	70	28.0404	3	3	3	4	4	3.4	1.33	2.76	607.0	4.90	1.940	1.48	0.93	0.628378	5.31	607.0	5.60	13	17011.2	0	97	152	76
202325715	Female	54	150	60	26.6667	3	3	4	4	3	3.4	1.02	2.68	16.9	4.20	2.348	1.20	0.88	0.733333	4.31	16.9	4.35	13	12218	0	79	117	72
202325258	Male	43	183	80	23.8884	3	3	3	4	4	3.4	1.08	3.92	67.5	5.81	2.411	1.06	1.24	1.16981	6.13	67.5	8.88	10	8977.22	0	95	155	69
202325212	Female	47	153	60	25.6312	3	3	3	4	4	3.4	1.31	1.61	92.9	3.71	1.606	1.34	0.50	0.373134	8.38	92.9	4.60	14	12684.2	0	75	128	77
202318491	Male	44	173	75	25.0593	3	3	3	4	4	3.4	1.60	3.60	46.4	6.08	2.68	1.58	1.15	0.727848	4.67	46.4	4.23	17	16407.5	0	84	116	90
202318412	Male	32	178	90	28.4055	3	3	3	4	4	3.4	0.81	2.62	23.8	3.98	1.56	1.00	0.82	0.82	3.30	23.8	4.19	16	16147.8	0		132	80
202317235	Male	46	173	73	24.3911	4	3	3	3	4	3.4	0.70	1.92	15.9	3.13	1.23	0.87	0.59	0.678161	3.14	15.9	4.91	7	15844.4	0	94	164	86
202335396	Male	35	180	95	29.321	3	3	3	5	4	3.6	1.02	3.13	141.1	4.50	1.415	1.10	0.97	0.881818	3.07	141.1	4.98	15	10707.1	0
202335233	Male	33	175	74	24.1633	3	3	4	4	4	3.6	1.45	4.51	162.8	6.77	2.958	1.30	1.70	1.30769	6.90	162.8	4.69	7	6401.3	0
202335231	Female	47	158	49	19.6283	3	3	4	4	4	3.6	1.63	1.79	88.5	3.92	0.652	1.52	0.50	0.328947	3.50	88.5	3.76	2	5701.75	0
202334828	Female	66	160	51	19.9219	3	3	4	4	4	3.6	1.62	2.62	226.8	4.73	0.840	1.49	0.71	0.47651	7.05	226.8	4.22	11	13815.7	0
202334473	Female	37	178	75	23.6713	3	3	3	4	5	3.6	1.42	3.26	21.1	5.22	1.209	1.43	0.94	0.657343	4.01	21.1	4.11	6	5787.52	0
202334359	Male	70	170	71	24.5675	3	3	4	5	3	3.6	1.10	3.49	687.2	5.01	1.332	1.18	1.09	0.923729	2.89	687.2	4.69	10	11272.7	0
202333350	Female	54	162	60	22.8624	3	4	4	4	3	3.6	1.21	2.23	111.3	4.14	1.097	1.35	0.72	0.533333	6.12	111.3	3.87	8	10116.5	0
202333128	Female	58	158	60	24.0346	3	4	4	4	3	3.6	1.31	2.42	397.5	4.41	1.488	1.39	0.83	0.597122	3.40	397.5	4.58	4	6090.64	0
202332518	Female	72	154	58	24.4561	3	3	4	4	4	3.6	1.09	3.24	151.3	4.93	2.468	1.19	1.21	1.01681	4.52	151.3	6.20	15	13264.7	0
202331641	Female	63	161	54	20.8325	3	4	3	3	5	3.6	1.20	3.32	327.2	4.74	0.788	1.23	1.04	0.845528	3.00	327.2	6.56	13	13367.9	0
202330846	Male	74	168	55	19.487	3	3	3	4	5	3.6	1.04	1.93	19.5	3.34	1.218	1.20	0.59	0.491667	4.11	19.5	9.32	7	7320.94	0
202329624	Female	58	158	70	28.0404	4	3	3	4	4	3.6	1.64	4.36		6.39	1.833	1.52	1.40	0.921053	6.79		3.51	11	17015.9	0
202329394	Male	68	162	70	26.6728	4	4	3	4	3	3.6	1.62	3.40	29.8	5.47	1.957	1.57	0.99	0.630573	2.76	29.8	10.39	8	8877.99	0	88	138	78
202329349	Female	51	160	60	23.4375	4	4	3	4	3	3.6	1.33	3.31	646.4	4.98	0.850	1.34	0.94	0.701493	3.78	646.4	4.30	12	16284.9	0	106	156	83
202329224	Male	53	172	78	26.3656	4	4	4	3	3	3.6	0.90	2.23	163.9	3.31	1.066	1.07	0.66	0.616822	2.57	163.9	4.98	10	11649.4	0	79	135	78
202329185	Male	52	168	58	20.5499	3	3	3	4	5	3.6	1.16	3.53	49.0	4.98	1.024	1.29	1.05	0.813953	3.22	49.0	4.43	7	8554.33	0	84	138	88
202328697	Male	54	165	70	25.7117	3	4	4	4	3	3.6	1.00	3.53	404.2	5.02	2.851	1.10	1.30	1.18182	3.90	404.2	7.29	4	8104.04	0	90	153	70
202328334	Female	72	151	65	28.5075	4	4	4	3	3	3.6	1.17	3.55	35.4	5.42	2.807	1.34	1.37	1.02239	5.38	35.4	5.51	6	12982.8	0	67	120	82
202328329	Female	54	155	56	23.3091	3	3	5	3	4	3.6	1.28	3.25	607.1	4.95	1.292	1.37	0.93	0.678832	2.76	607.1	5.01	5	4794.82	0	72	124	68
202328102	Female	41	168	62.5	22.1443	2	3	3	5	5	3.6	1.34	3.53	580.2	5.34	1.451	1.37	1.13	0.824818	4.23	580.2	4.59	8	13871.4	0	68	108	70
202327923	Male	65	176	62	20.0155	3	4	4	4	3	3.6	1.59	2.88	184.2	4.84	1.142	1.50	0.81	0.54	3.05	184.2	5.12	9	8603.36	0	82	136	72
202327860	Male	80	165	60	22.0386	3	3	3	3	3	3.6	0.81	2.32	28.7	3.56	1.538	1.01	0.68	0.673267	4.61	28.7	5.48	24	20011.4	0	88	138	80
202327857	Female	73	150	45	20	3	3	3	3	3	3.6	1.65	2.23	31.6	4.33	1.184	1.53	0.63	0.411765	4.74	31.6	4.31	21	18705	0	75	149	78
202327776	Male	43	170	70	24.2215	2	2	2	2	2	3.6	1.02	4.54	125.2	6.06	1.377	1.09	1.50	1.37615	3.51	125.2	5.37	9	8588.73	0	72	116	79
202327762	Male	84	162	60	22.8624	4	3	4	4	5	3.6	1.30	3.05	61.0	4.81	0.851	1.27	0.88	0.692913	4.90	61.0	7.21	7	11257.7	0	88	177	88
202327732	Female	81	148	54	24.653	4	4	5	4	4	3.6	1.15	2.40		4.10	1.699	1.32	0.82	0.621212				13	15981.1	0	75	129	73
202327571	Male	67			#DIV/0!	3	3	3	3	3	3.6	1.02	3.46	311.1	5.16	1.855	1.16	1.11	0.956897	4.80	311.1	5.03	11	29723.2	0	89	150	69
202327482	Male	62	170	72	24.9135	3	3	4	4	5	3.6	0.90	2.54	80.2	3.87	1.796	1.06	0.85	0.801887	3.64	80.2	5.98	12	12135	0	90	142	72
202327336	Male	43	165	71	26.079	2	2	2	2	3	3.6	1.09	3.49	601.3	4.98	2.078	1.17	1.20	1.02564	3.49	601.3	5.33	4	6670.22	0	76	114	76
202327303	Female	49	160	65	25.3906	3	4	4	4	5	3.6	1.02	2.28	36.2	4.95	5.332	1.20	0.96	0.8	6.76	36.2	4.15	5	10928.6	0	69	129	76
202327248	Female	37	166	67	24.3141	3	2	4	4	5	3.6	1.01	3.53	50.8	5.24	2.481	1.02	1.28	1.2549	4.41	50.8	4.28	9	8962.43	0	89	135	69
202327003	Male	59	174	90	29.7265	3	3	4	4	4	3.6	1.05	2.33	51.4	3.71	2.083	1.21	0.75	0.619835	3.56	51.4	4.72	7	11073.8	0	70	135	86
202326306	Female	68	153	56	23.9224	4	4	4	3	3	3.6	1.47	2.89	52.5	5.76	3.142	1.51	0.97	0.642384	7.13	52.5	6.30	7	13019.5	0	68	130	82
202326251	Female	64	158	60	24.0346	4	4	4	3	3	3.6	1.21	3.58	205.5	5.41	1.952	1.35	1.17	0.866667	4.00	205.5	5.87	13	12889.4	0	70	136	78
202325614	Female	67	155	50	20.8117	3	3	4	4	4	3.6	1.25	5.25	772.8	7.05	1.078	1.16	1.59	1.37069	4.22	772.8	4.15	9	10218.7	0	51	163	80
202325325	Female	69	157	47	19.0677	3	4	3	4	4	3.6	1.32	3.00	453.3	4.85	1.732	1.29	0.87	0.674419	2.92	453.3	4.89	16	15793.2	0	80	153	70
202325205	Male	46	168	80	28.3447	3	4	3	4	4	3.6	1.04	2.37	102.8	4.22	2.536	1.15	0.83	0.721739	4.88	102.8	4.42	7	10625.3	0	68	109	72
202318576	Male	53	176	65	20.984	3	3	3	4	5	3.6	0.89	2.60	20.1	4.03	0.88	1.04	0.75	0.721154	4.54	20.1	4.86	4	5011.12	0	82	122	99
202317229	Male	25	168	53	18.7783	3	3	4	4	4	3.6	1.10	1.93	61.3	3.53	0.98	1.16	0.54	0.465517	2.52	61.3	5.16	3	10372.6	0	84	128	86
202317223	Female	32	160	50	19.5312	4	3	3	4	4	3.6	1.04	3.02	172.1	4.57	0.63	1.08	0.76	0.703704	2.40	172.1	3.86	12	12805.6	0	74	118	79
202308136	Male	54	180	100	30.8642	2	3	4	4	5	3.6	1.26	4.37	70.0	6.37	5.25	1.34	1.97	1.47015	6.52	70.0	8.88	11	12210.6	0	110	166	97
202334614	Male	61	170	80	27.6817	4	3	4	4	4	3.8	1.05	3.16	34.3	5.12	4.020	1.27	1.12	0.88189	6.94	34.3	4.77	7	7383.5	0
202334586	Female	55	153	56	23.9224	3	4	4	4	4	3.8	1.58	4.86	107.3	6.94	2.627	1.49	1.64	1.10067	5.41	107.3	4.46	13	14477	0
202334146	Male	47	176	80	25.8264	4	3	4	4	4	3.8	0.99	3.22	24.2	5.65	4.795	1.12	1.25	1.11607	7.46	24.2	5.06	10	7659.02	0
202334097	Male	69	158	61	24.4352	4	4	4	4	3	3.8	1.22	2.74	222.4	4.35	1.671	1.37	0.91	0.664234	3.89	222.4	7.04	14	13569.7	0
202332453	Female	76	155	70	29.1363	4	5	4	3	3	3.8	1.08	3.40	297.3	5.14	2.056	1.17	1.19	1.01709	4.80	297.3	6.48	12	21491.5	0
202332425	Female	76	168	72	25.5102	4	3	4	4	4	3.8	1.42	3.65	119.7	5.69	2.680	1.45	1.25	0.862069	5.06	119.7	4.90	7	7605.98	0
202332401	Male	61	180	90	27.7778	3	3	4	4	5	3.8	1.19	3.51	214.5	4.99	1.380	1.25	1.23	0.984	3.82	214.5	4.96	7	9579.51	0
202332269	Female	68	165	50	18.3655	4	3	4	4	4	3.8	1.72	3.85	334.6	6.27	1.641	1.52	1.26	0.828947	4.23	334.6	7.94	7	12243.9	0
202330241	Female	74	158	71	28.441	4	4	4	3	4	3.8	1.28	4.16	490.1	5.74	1.778	1.19	1.32	1.10924	3.55	490.1	4.77	8	6746.85	0
202330091	Female	87	160	55	21.4844	4	4	3	4	4	3.8	1.38	3.47	357.9	5.78	2.247	1.36	1.24	0.911765	6.43	357.9	4.59	11	20171	0
202329707	Female	75	155	61	25.3902	4	4	4	4	3	3.8	1.15	3.56	182.1	5.13	1.024	1.21	1.14	0.942149	3.80	182.1	4.40	16	14141.8	0
202329202	Female	59	156	60	24.6548	3	3	4	4	5	3.8	1.41	3.37	82.6	5.36	1.770	1.48	1.00	0.675676	4.85	82.6	4.36	13	12182.6	0			78
202328037	Male	84	170	60	20.7612	3	4	4	4	4	3.8	1.05	3.70	609.0	5.06	0.832	1.07	1.10	1.02804	2.93	609.0	9.42	11	14665.3	0	61	99	75
202326764	Male	81	165	67.5	24.7934	3	4	4	4	4	3.8	1.05	2.35	127.3	3.73	1.111	1.16	0.66	0.568966	2.77	127.3	4.46	9	9923.4	0	84	136	63
202326399	Female	52	160	108	42.1875	4	4	4	4	3	3.8	1.27	3.83	202.0	5.65	2.700	1.39	1.38	0.992806	4.35	202.0	6.72	7	9847.97	0	104	160	68
202326202	Female	44	166	82	29.7576	3	3	3	4	4	3.8	0.84	2.24	109.8	4.02	4.066	1.19	0.93	0.781513	5.44	109.8	4.72	13	10326.8	0	89	138	76
202326198	Male	70	155	75	31.2175	3	4	5	5	3	3.8	0.93	3.10	103.5	4.60	1.802	1.21	1.08	0.892562	3.45	103.5	4.96	3	6772.72	0	79	126	78
202326186	Female	46	163	60	22.5827	3	3	3	4	4	3.8	1.20	3.13	153.8	4.73	1.073	1.27	0.89	0.700787	3.56	153.8	5.07	13	8763.77	0	67	116	78
202326151	Female	57	158	63	25.2363	5	4	4	4	4	3.8	1.36	4.78	159.1	6.69	1.918	1.41	1.57	1.11348	4.40	159.1	4.50	5	8665.95	0	81	143	67
202326123	Female	71	160	78	30.4688	5	5	4	4	4	3.8	1.68	2.79	104.4	5.19	1.621	1.86	0.88	0.473118	6.45	104.4	6.20	11	20428.9	0	71	133	81
202326122	Male	67	163	60	22.5827	5	5	4	4	4	3.8	1.15	2.76	356.5	4.80	2.571	1.36	1.07	0.786765	5.40	356.5	5.18	4	7161.32	0	84	121	65
202326103	Female	63	160	80	31.25	5	5	3	4	4	3.8	1.11	3.28	66.9	5.28	3.003	1.27	1.11	0.874016	5.01	66.9	4.86	11	11021.4	0	68	118	62
202326093	Female	36	163	95	35.756	3	3	3	3	4	3.8	1.18	3.69	200.0	5.62	3.280	1.30	1.40	1.07692	7.25	200.0	5.23	13	9693.29	0	92	144	95
202326054	Male	58	168	60	21.2585	5	5	5	4	4	3.8	0.99	2.61	178.6	4.11	2.044	1.25	0.90	0.72	2.24	178.6	4.37	7	13486.5	0	71	134	94
202326003	Female	77	160	80	31.25	5	5	5	4	5	3.8	1.14	3.72	31.3	5.35	1.683	1.30	1.12	0.861538	3.62	31.3	5.05	11	9557.19	0	84	145	68
202325945	Female	54	165	60	22.0386	3	4	3	4	5	3.8	2.02	2.47	372.4	5.18	0.822	1.78	0.67	0.376404	5.87	372.4	4.34	5	6290.72	0	79	130	72
202325562	Male	74	170	70	24.2215	4	3	4	4	4	3.8	1.15	3.17	107.6	5.11	2.696	1.27	1.17	0.92126	6.45	107.6	NORMAL	14	17484.6	0		161	58
202325530	Female	66	157	65	26.3702	3	3	4	4	5	3.8	1.17	2.92	100.6	4.57	1.554	1.29	0.87	0.674419	4.41	100.6	4.71	10	10581.4	0	67	110	75
202325335	Male	68	168	72.5	25.6874	3	4	4	5	3	3.8	1.10	2.79	136.8	4.36	2.052	1.20	0.92	0.766667	3.83	136.8	4.40	11	10510.9	0	85	131	77
202325186	Female	58	160	50	19.5312	4	3	4	4	4	3.8	1.00	2.59	368.5	4.00	1.545	1.13	0.81	0.716814	3.29	368.5	4.55	10	17295.2	0	74	123	84
202318528	Male	52	163	66	24.841	4	4	4	4	3	3.8	1.11	2.48	729.2	4.03	0.72	1.15	0.69	0.6	4.69	729.2	5.27	17	14233.5	0	79	126	80
202317399	Female	34	164	63	23.4236	3	3	4	4	5	3.8	1.22	2.48	90.2	4.17	0.44	1.20	0.68	0.566667	2.72	90.2	4.34	5	15105	0	69	104	93
202317323	Male	57	170	60	20.7612	4	4	4	4	3	3.8	0.99	2.29	29.8	3.82	1.50	1.17	0.76	0.649573	2.80	29.8	4.35	12	14999	0	77	129	66
202317156	Male	53	170	80	27.6817	3	3	4	4	5	3.8	0.99	2.68	152.6	4.26	1.78	1.20	0.82	0.683333	2.95	152.6	4.86	7	8583.82	0	102	176	90
202317091	Male	84	160	65	25.3906	4	3	4	4	4	3.8	0.95	2.95	172.0	4.45	1.02	1.11	0.96	0.864865	3.01	172.0	4.69	11	15495.2	0	87	115	70
202316436	Female	57	160	64	25	3	4	4	4	4	3.8	1.25	3.01	105.0	4.80	0.99	1.33	0.85	0.639098	3.23	105.0	4.96	8	8690.94	0	89	139	80
202306819	Female	74	154	60	25.2994	2	3	4	5	5	3.8	1.44	4.68	59.3	5.99	1.33	1.61	1.28	0.795031	4.31	59.3	4.96	13	16912	0	70	130	62
202334424	Female	54	156	67	27.5312	5	4	3	4	4	4	1.51	4.13	274.1	6.13	1.268	1.44	1.24	0.861111	3.79	274.1	4.15	7	7197.19	0
202333452	Female	71	160	75	29.2969	4	4	4	4	4	4	1.02	2.49	158.4	4.15	2.000	1.18	0.85	0.720339	2.96	158.4	7.30	9	12355.8	0
202333086	Female	67	158	45	18.026	4	4	4	4	4	4	1.41	2.27	422.9	4.27	0.648	1.29	0.64	0.496124	3.65	422.9	4.16	11	10775.1	0
202332753	Male	76	160	67	26.1719	4	4	4	4	4	4	0.92	2.78	137.3	4.07	1.668	1.09	0.89	0.816514	3.50	137.3	5.06	8	8770.51	0
202332275	Male	75	164	58	21.5645	3	4	4	4	5	4	1.02	2.64	655.6	3.79	0.651	1.12	0.76	0.678571	3.36	655.6	5.45	13	9618.89	0
202331554	Female	66	167	75	26.8923	3	4	4	4	5	4	1.09	1.66	253.2	2.95	0.565	1.20	0.51	0.425	3.90	253.2	5.14	13	15655.2	0
202331130	Male	80	165	45	16.5289	3	4	4	4	5	4	1.80	2.70	46.9	5.07	0.841	1.61	0.78	0.484472	3.75	46.9	NORMAL	7	12070.9	0
202331118	Female	62	157	51	20.6905	4	5	4	4	3	4	1.49	1.90	133.5	3.84	0.684	1.50	0.56	0.373333	3.28	133.5	3.49	3	6151.3	0
202331015	Male	81	181	85	25.9455	4	4	4	4	4	4	0.69	1.31	226.3	2.15	0.711	0.94	0.41	0.43617	2.22	226.3	9.84	14	13547.2	0
202329646	Female	83	164	60	22.3081	3	4	4	5	4	4	1.35	2.85	191.3	4.50	0.763	1.35	0.80	0.592593	4.13	191.3	5.95	10	12684.8	0
202329233	Female	69	168	74	26.2188	4	4	4	4	4	4	1.16	3.26	45.9	4.78	1.630	1.35	1.03	0.762963	4.41	45.9	4.42	9	8019.66	0	85	136	79
202328764	Female	79	158	65	26.0375	4	4	4	4	4	4	1.40	3.00	117.1	4.78	1.377	1.51	0.94	0.622517	4.93	117.1	4.60	2	6865.2	0	93	147	89
202328210	Male	70	175	64	20.898	4	5	4	4	3	4	1.06	2.85	687.0	4.26	0.896	1.11	0.89	0.801802	2.89	687.0	5.23	11	8429.98	0	83	133	85
202327952	Female	76	160	60	23.4375	4	4	4	4	4	4	1.34	2.02	115.8	3.57	1.044	1.38	0.54	0.391304	4.19	115.8	8.43	12	11091.9	0	80	175	68
202327862	Female	72	158	65	26.0375	3	4	4	5	4	4	1.02	2.98	27.1	4.35	1.483	1.21	0.88	0.727273	3.82	27.1	5.57	13	14684.1	0	78	128	78
202327242	Female	66	155	53	22.0604	3	4	4	4	5	4	1.13	3.37	79.7	5.06	3.403	1.27	1.14	0.897638	4.30	79.7	5.32	5	8321.96	0	81	139	75
202327013	Female	78	156	62	25.4767	4	4	4	4	4	4	1.32	3.70	330.9	5.28	1.256	1.30	1.03	0.792308	3.22	330.9	7.41	8	10262.9	0	88	130	80
202325858	Female	74	153	44	18.7962	4	4	4	4	4	4	1.46	2.78	233.5	4.75	0.987	1.45	0.77	0.531034	4.04	233.5	3.89	15	14472.5	0	70	151	60
202325616	Female	71	167	80	28.6851	4	4	4	4	4	4	1.06	3.14	152.7	4.70	1.514	1.20	0.98	0.816667	3.59	152.7	5.14	14	22005.5	0	88	133	56
202325509	Female	55	165	56	20.5693	3	4	5	4	4	4	1.16	3.24	36.9	4.91	1.739	1.29	1.10	0.852713	3.23	36.9	4.80	14	13564.8	1	70	120	80
202325321	Male	79	186	92.5	26.7372	4	4	4	4	4	4	1.13	3.49	249.1	5.09	1.312	1.11	1.03	0.927928	3.43	249.1	6.57	10	11942	0	80	130	73
202325319	Male	65	178	70	22.0932	5	4	3	4	4	4	0.92	2.39	591.7	3.68	1.701	1.12	0.65	0.580357	2.76	591.7	7.33	8	9809.75	0	88	127	97
202325181	Male	57	177	83	26.493	4	4	4	4	4	4	0.92	2.47	158.8	3.80	2.030	1.10	0.78	0.709091	3.04	158.8	5.37	5	7521.92	0	79	138	78
202325098	Male	72	175	65	21.2245	4	3	4	4	4	4	0.69	2.60	398.0	3.55	0.928	0.73	0.80	1.09589	2.95	398.0	5.13	9	10082.9	1	82	151	93
202325082	Female	42	173	134	44.7726	2	2	2	2	3	4	0.95	1.68	51.5	2.97	1.778	1.22	0.59	0.483607	4.13	51.5	7.52	12	14751.3	1	89	128	98
202325081	Male	66	175	80	26.1224	3	3	2	3	5	4	1.07	3.92	61.5	5.54	1.494	1.02	1.32	1.29412	4.29	61.5	4.71	7	9921.86	0	77	160	76
202325077	Female	42	160	65	25.3906	2	2	3	3	2	4	1.00	3.45	27.4	4.86	0.829	0.99	0.98	0.989899	4.05	27.4	4.69	13	12753.9	1	77	124	79
202325062	Male	50	168	65	23.03	3	3	3	2	2	4	1.09	3.22	306.7	4.79	1.856	1.12	1.02	0.910714	3.37	306.7	4.59	9	8204.51	0	70	139	60
202324977	Male	73	169	52	18.2066	3	3	3	3	4	4	0.99	3.20	52.5	4.72	1.612	1.12	1.07	0.955357	2.95	52.5	4.89	6	8737.54	0	76	161	78
202324964	Female	35	162	100	38.1039	4	4	4	4	4	4	1.16	2.81	48.0	5.10	4.637	1.33	1.14	0.857143	7.06	48.0	6.14	12	9824.72	0	83	123	98
202324828	Male	89	175	70	22.8571	3	4	4	4	4	4	1.00	1.56	249.5	2.84	0.637	1.08	0.47	0.435185	3.71	249.5	4.71	8	10901.6	0	66	133	80
202324791	Female	66	162	100	38.1039	3	4	4	4	4	4	1.22	3.19	58.9	4.83	1.105	1.35	0.97	0.718519	3.44	58.9	5.30	8	8933.72	1	107	140	66
202324776	Female	66	160	60	23.4375	2	2	3	4	4	4	1.17	3.69	269.6	5.50	1.350	1.23	1.27	1.03252	4.85	269.6	6.09	14	14029.5	0	75	133	84
202324627	Female	69	150	48.2	21.4222	4	3	3	3	5	4	0.83	1.80	90.0	2.87	0.931	1.05	0.50	0.47619	2.32	90.0	NORMAL	9	8182.97	0		130	79
202324620	Female	70	166	70	25.4028	3	4	4	4	4	4	1.19	4.02	176.2	5.74	1.461	1.31	1.25	0.954198	3.79	176.2	4.94	11	15379.1	0	85	146	62
202324614	Female	75	155	61	25.3902	5	4	4	4	4	4	1.32	3.55	60.4	5.58	1.841	1.42	1.13	0.795775	3.87	60.4	4.81	15	14773.4	0	93	149	78
202324611	Female	60	156	65	26.7094	3	3	4	4	4	4	1.64	4.18	275.6	6.56	1.913	1.58	1.18	0.746835	4.76	275.6	4.39	7	8941.34	0	88	134	80
202324607	Female	81	150	56	24.8889	4	4	4	4	4	4	1.32	1.94	90.2	3.61	0.653	1.24	0.59	0.475806	3.90	90.2	5.03	11	13095.3	0	72	128	72
202324538	Female	78	158	56	22.4323	4	4	4	5	5	4	1.55	4.12	67.6	6.46	1.526	1.51	1.34	0.887417	5.34	67.6	5.16	8	11049.4	0	97	170	72
202324533	Male	68	168	70	24.8016	4	3	4	4	4	4	0.88	1.73	467.9	2.98	0.900	1.12	0.53	0.473214	3.81	467.9	4.39	5	10601.3	0	85	122	88
202324369	Male	70	173	77	25.7276	2	2	3	4	4	4	0.96	2.70	148.8	4.04	1.577	1.18	0.83	0.70339	3.37	148.8	7.14	11	12297.5	1	71	129	75
202324368	Male	50	167	65	23.3067	2	2	3	3	4	4	1.08	2.76	129.1	7.74	7.895	1.27	0.83	0.653543	14.75	129.1	6.26	6	11318.1	0	70	121	92
202325155	Male	69	168	65	23.03	3	4	5	3	3	4	1.13	3.27	149.7	5.11	2.244	1.23	1.02	0.829268	3.99	149.7	NORMAL	7	7521.15	0	86	129	102
202324366	Male	79	167	70	25.0995	3	3	4	4	3	4	1.00	1.88	138.6	3.12	0.913	1.20	0.55	0.458333	2.82	138.6	6.68	13	10674.7	0	75	156	72
202324267	Female	66	164	65	24.1672	3	4	3	4	3	4	1.46	1.87	390.5	3.73	1.138	1.45	0.52	0.358621	4.27	390.5	4.95	13	14103.7	0	73	139	70
202323072	Female	65	161	57	21.9899	3	4	4	4	5	4	1.47	3.71	71.6	5.85	0.866	1.50	1.09	0.726667	3.74	71.6	5.10	6	11224.6	0	75	115	70
202320619	Female	50	166	58	21.048	3	3	3	3	4	4	1.48	3.14	62.9	5.22	0.564	1.40	0.94	0.671429	3.59	62.9	4.48	12	15161.2	0	68	110	61
202319963	Female	68	168	70	24.8016	2	3	3	4	5	4	1.20	3.72	51.5	5.83	2.72	1.28	1.29	1.00781	5.06	51.5	5.39	11	12788.9	0	92	147	78
202318845	Male	50	170	81	28.0277	3	3	4	4	3	4	1.17	3.04	11.9	5.85	7.89	1.17	1.16	0.991453	2.97	11.9	7.86	11	14639.6	0		146	82
202318841	Female	71	154	57	24.0344	4	4	4	4	5	4	1.25	2.86	95.5	4.79	1.45	1.26	0.87	0.690476	3.67	95.5	4.45	9	13105.3	0	90	150	92
202318784	Male	57	165	62	22.7732	3	3	4	4	4	4	0.92	2.34	264.0	3.83	1.45	1.01	0.70	0.693069	3.32	264.0	5.56	11	9872.72	0	84	146	77
202318783	Male	67	176	70	22.5981	4	4	4	4	5	4	1.18	1.84	121.0	4.26	1.67	1.17	0.49	0.418803	7.96	121.0	4.53	10	10666.3	0	78	122	83
202318732	Female	81	154	45	18.9745	4	4	4	5	5	4	1.56	2.46	94.1	4.68	0.76	1.50	0.78	0.52	3.99	94.1	6.06	14	12064.1	0	68	154	77
202318706	Female	78	156	60	24.6548	4	4	4	4	5	4	1.19	3.13	393.9	4.97	1.67	1.41	0.91	0.64539	4.02	393.9	4.64	7	10512.4	0	82	151	77
202318704	Male	70	178	96	30.2992	4	4	5	5	5	4	0.81	1.91	52.3	3.30	2.75	1.14	0.67	0.587719	2.26	52.3	4.43	10	14830.2	0	95	143	76
202318694	Female	59	163	66	24.841	3	4	4	4	5	4	1.04	2.26	97.6	3.80	0.91	1.16	0.66	0.568966	3.64	97.6	NORMAL	12	11154.9	0	81	127	84
202318587	Male	70	160	70	27.3438	4	4	4	4	4	4	1.28	2.85	23.8	5.75	4.19	1.51	1.01	0.668874	7.01	23.8	9.49	3	9689.37	0	89	150	80
202318561	Male	74	168	69	24.4473	4	4	4	4	4	4	1.30	2.59	270.4	4.44	0.62	1.31	0.67	0.51145	3.62	270.4	4.72	3	10410.5	0	71	148	77
202318499	Female	62	161	75	28.9341	3	4	4	4	5	4	1.29	1.43	45.5	3.16	0.76	1.33	0.41	0.308271	3.44	45.5	5.13	12	12370.8	1	82	148	82
202318490	Female	71	158	60	24.0346	3	4	4	4	5	4	1.33	3.87	469.0	7.33	5.79	1.25	1.64	1.312	7.47	469.0	7.74	11	16615.7	0	69	124	95
202318483	Female	65	158	48	19.2277	4	4	4	4	4	4	1.45	3.61	303.9	5.91	0.90	1.39	0.97	0.697842	4.23	303.9	4.25	8	14201.7	0	74	113	65
202318462	Male	66	176	73	23.5666	4	3	4	4	5	4	0.79	3.26	219.4	4.58	1.09	0.97	0.97	1	3.39	219.4	4.98	8	8603.76	0	66	136	86
202318392	Female	63	160	55	21.4844	4	4	4	4	4	4	1.89	5.40	673.8	8.40	2.59	1.53	1.92	1.2549	7.87	673.8	4.42	6	8167.8	0	82	136	72
202318382	Female	49	164	70	26.0262	3	4	4	5	4	4	1.21	3.99	217.8	6.24	2.67	1.29	1.33	1.03101	5.63	217.8	NORMAL	8	11080.9	0		142	79
202318350	Female	61	162	54	20.5761	4	4	4	4	4	4	1.16	3.38	165.9	5.41	2.23	1.19	1.20	1.0084	4.18	165.9	4.33	9	9432.46	0	72	120	74
202318306	Male	54	169	64	22.4082	4	4	4	4	4	4	1.18	2.46	123.9	4.22	0.85	1.32	0.70	0.530303	3.05	123.9	9.58	8	12705.3	0	79	129	61
202318220	Female	70	156	65	26.7094	4	4	4	4	4	4	1.35	3.23	80.1	5.84	3.85	1.45	1.22	0.841379	5.55	80.1	5.12	9	13967.4	0	91	131	79
202318138	Female	70	163	68	25.5937	4	4	4	4	4	4	1.50	3.60	615.0	5.86	1.11	1.52	1.10	0.723684	5.35	615.0	5.31	14	13304	0	71	165	68
202318136	Female	66	156	50	20.5457	4	4	4	4	4	4	1.15	1.88	487.5	3.46	0.73	1.23	0.59	0.479675	5.50	487.5	3+ 28	9	12102.3	0	68	129	94
202318049	Male	71	168	60	21.2585	4	4	4	4	4	4	1.10	2.52	207.2	4.18	0.85	1.20	0.78	0.65	4.28	207.2	4.58	7	15239.6	0	78	133	70
202318025	Female	68	160	48	18.75	4	4	4	4	4	4	1.04	2.82	138.5	4.50	1.45	1.22	0.93	0.762295	4.86	138.5	4.89	26	23992.5	0	83	156	94
202317448	Female	75	160	65	25.3906	4	4	4	4	4	4	0.97	2.35	129.9	4.08	2.19	1.38	0.79	0.572464	5.57	129.9	6.34	11	18927.4	0	82	127	92
202317417	Female	57	160	57	22.2656	4	4	4	4	4	4	1.24	2.23	43.3	4.06	1.09	1.48	0.66	0.445946	3.15	43.3	4.37	5	12698	0	97	149	78
202317291	Female	71	165	65	23.8751	4	4	4	4	4	4	0.96	2.33	185.4	4.01	2.15	1.18	0.83	0.70339	3.23	185.4	5.64	14	13672	0	75	141	89
202317184	Female	70	156	50	20.5457	4	4	4	4	4	4	1.13	3.62	693.8	5.85	2.37	1.22	1.38	1.13115	3.94	693.8	4.96	13	14473.1	0	57	156	72
202317150	Female	58	160	61	23.8281	3	4	4	4	5	4	1.12	1.41	336.9	3.12	1.23	1.30	0.45	0.346154	3.99	336.9	4.47	7	8733.25	0	75	119	57
202316963	Female	75	151	58	25.4375	4	4	4	4	4	4	1.95	0.83	68.9	3.19	0.44	1.67	0.27	0.161677	4.87	68.9	4.57	25	32715.2	0	68	149	77
202316672	Male	39	170	90	31.1419	4	4	4	4	4	4	0.92	2.30	13.2	3.78	1.43	1.19	0.77	0.647059	2.77	13.2	4.23	9	8710.35	0	95	143	85
202316634	Female	72	171	80	27.3588	4	4	4	4	4	4	1.18	2.25	24.3	4.09	0.94	1.24	0.71	0.572581	2.72	24.3	3+ 28	10	10370	0	89	145	75
202334719	Female	59	169	70	24.5089	4	4	4	4	5	4.2	1.29	2.00	64.5	4.12	3.170	1.53	0.60	0.392157	5.86	64.5	4.88	5	8123.55	0
202334630	Male	52	178	65	20.5151	4	4	4	4	5	4.2	0.95	2.76	51.1	4.38	1.585	1.08	0.98	0.907407	4.93	51.1	6.16	7	7419.7	0
202334459	Male	53	170	71	24.5675	4	4	4	5	4	4.2	0.84	2.73	59.8	3.72	0.790	1.03	0.78	0.757282	2.69	59.8	4.75	24	14639.7	0
202334282	Female	69	156	45	18.4911	4	4	4	5	4	4.2	1.11	2.83	168.3	4.60	1.438	1.18	0.82	0.694915	4.39	168.3	4.22	6	8234.45	0
202333861	Female	84	155	51	21.2279	4	4	4	5	4	4.2	0.96	1.74	35.9	3.01	1.467	1.24	0.55	0.443548	2.92	35.9	4.32	25	16211.1	0
202333777	Male	70	165	70	25.7117	4	4	4	4	5	4.2	1.22	3.78	74.9	5.56	2.329	1.34	1.23	0.91791	3.93	74.9	5.06	11	9504.99	0
202333136	Female	74	无		#VALUE!	4	4	4	5	4	4.2	0.99	2.96	114.6	4.42	1.436	1.19	0.92	0.773109	3.78	114.6	4.97	7	9216.59	0
202331325	Female	82	156	55	22.6003	4	5	4	4	4	4.2	0.81	2.74	55.6	4.09	2.143	0.98	0.81	0.826531	3.36	55.6	4.46	7	7346.75	0
202331000	Male	77	181	80	24.4193	4	4	4	5	4	4.2	1.00	3.04	36.5	4.57	1.815	1.19	1.02	0.857143	3.81	36.5	8.05	7	9407.02	0
202330788	Male	68	178	90	28.4055	3	4	4	5	5	4.2	0.63	1.50	53.4	2.44	2.019	0.88	0.51	0.579545	2.51	53.4	6.31	10	10705.6	0
202330580	Female	81	160	60	23.4375	5	4	4	4	4	4.2	1.32	3.25	363.8	4.91	0.871	1.35	0.91	0.674074	4.01	363.8	5.13	3	8112.02	0
202329907	Female	67	158	70	28.0404	4	5	3	4	5	4.2	1.28	2.72	116.3	4.49	1.615	1.40	0.78	0.557143	3.66	116.3	4.43	9	19180.2	0
202329334	Male	72	170	76	26.2976	4	4	4	5	4	4.2	0.90	2.40	31.0	3.68	1.226	1.11	0.77	0.693694	3.47	31.0	4.73	6	7007.35	0	82	128	81
202329257	Female	52	158	65	26.0375	4	4	5	4	4	4.2	1.31	2.42	65.9	4.23	1.921	1.42	0.77	0.542254	5.21	65.9	4.00	12	16268	0	85	177	69
202328288	Male	70	170	65	22.4913	4	4	4	4	5	4.2	1.00	1.50	486.8	2.71	1.499	1.18	0.54	0.457627	2.73	486.8	4.79	14	15228.7	0	75	120	93
202328218	Female	64	162	64	24.3865	4	4	4	4	5	4.2	1.04	3.41	84.7	4.83	1.206	1.16	1.12	0.965517	3.17	84.7	4.62	4	12256.3	0	85	154	62
202328189	Male	66	170	78	26.9896	4	4	4	4	5	4.2	1.02	1.79	54.0	3.25	1.877	1.20	0.66	0.55	3.19	54.0	5.55	4	5633.75	0	82	111	64
202326576	Female	65	165	81	29.7521	4	4	4	4	5	4.2	1.30	3.28	250.5	5.11	2.137	1.41	1.04	0.737589	3.94	250.5	4.52	8	7697.11	0	82	127	72
202325572	Female	67	164	67	24.9108	4	5	4	4	4	4.2	1.08	2.35	198.0	4.15	1.897	1.38	0.71	0.514493	5.20	198.0	4.14	8	9787.85	0	84	145	68
202325548	Male	67	169	65	22.7583	4	4	5	4	4	4.2	0.83	1.89	482.4	3.12	1.691	1.11	0.62	0.558559	2.24	482.4	5.64	8	11581.3	0	93	145	75
202325270	Female	68	160	56	21.875	4	4	5	4	4	4.2	1.19	2.31	55.3	3.79	1.365	1.23	0.62	0.504065	4.86	55.3	4.43	11	9757.93	0		116	74
202318636	Female	83	150	54	24	4	4	4	4	5	4.2	0.97	3.06	95.9	4.67	1.56	1.07	0.98	0.915888	6.35	95.9	4.95	14	12801.1	0	81	156	92
202318498	Female	60	160	48	18.75	4	4	4	4	5	4.2	1.31	2.77	191.9	4.77	0.95	1.42	0.80	0.56338	3.72	191.9	4.15	7	10285.8	0	66	104	67
202318074	Male	76	174	70	23.1206	3	4	5	4	5	4.2	0.96	2.13	498.8	3.63	1.30	1.19	0.68	0.571429	3.08	498.8	6.52	12	20200.9	0	92	162	74
202318058	Female	65	152	62	26.8352	4	4	4	4	5	4.2	1.37	3.03	110.1	5.02	1.44	1.56	1.00	0.641026	3.64	110.1	5.49	10	10181	0	106	175	83
202317942	Male	63	167	70	25.0995	4	4	4	4	4	4.2	1.27	2.05	374.2	3.83	1.11	1.46	0.70	0.479452	3.45	374.2	5.38	10	10514.3	0	82	138	86
202317919	Female	68	161	62	23.9188	4	4	4	4	4	4.2	1.78	3.31	179.8	5.86	0.96	1.58	0.99	0.626582	4.88	179.8	4.48	13	12671.2	0	100	171	76
202317856	Female	82	156	65	26.7094	4	4	4	4	4	4.2	1.83	4.53	117.2	7.17	1.57	1.72	1.64	0.953488	5.54	117.2	9.17	13	13546.1	0	81	173	92
202317832	Female	49	160	60	23.4375	4	3	3	4	5	4.2	1.41	2.78	173.9	4.71	0.85	1.49	0.77	0.516779	3.19	173.9	4.97	16	17235.8	0	91	140	66
202317808	Female	50	158	60	24.0346	4	4	4	4	4	4.2	1.12	2.50	85.0	4.49	2.36	1.30	0.85	0.653846	5.15	85.0	5.36	15	22893.6	0	100	138	81
202317807	Male	59	168	70	24.8016	3	3	4	4	4	4.2	0.94	3.10	336.7	4.58	1.01	1.07	0.95	0.88785	3.62	336.7	4.37	12	15516.6	0	86	139	78
202317794	Female	49	163	66	24.841	4	4	3	4	4	4.2	1.32	2.30	40.9	4.06	0.62	1.37	0.66	0.481752	3.37	40.9	4.62	7	9585.82	0	74	101	68
202317771	Male	68	176	67	21.6296	4	3	4	4	4	4.2	1.59	3.39	28.4	5.67	1.05	1.56	0.98	0.628205	3.97	28.4	4.17	8	12311.7	0	82	127	63
202317645	Female	54	165	78	28.6501	4	4	4	4	4	4.2	1.09	2.78	86.1	4.62	2.02	1.22	0.90	0.737705	4.09	86.1	NORMAL	7	6317.83	0	67	115	72
202317624	Male	55	174	67	22.1297	4	4	4	5	4	4.2	0.72	1.81	152.3	2.97	0.91	0.87	0.55	0.632184	2.71	152.3	4.67	9	12750	0	95	142	80
202317601	Female	48	160	65	25.3906	4	4	4	4	5	4.2	1.18	3.80	932.7	5.63	1.13	1.27	1.14	0.897638	4.16	932.7	4.18	9	12049.5	0	86	132	62
202317514	Female	66	154	69	29.0943	4	4	4	4	5	4.2	1.22	3.00	127.6	4.95	2.03	1.55	1.00	0.645161	4.33	127.6	5.73	9	11701.9	0	81	141	77
202317493	Male	83	172	75	25.3515	4	4	4	5	5	4.2	0.87	3.08	368.4	4.60	1.50	1.05	1.12	1.06667	4.03	368.4	4.96	22	14820.5	0	82	135	88
202317482	Female	56	155	57	23.7253	3	3	4	4	3	4.2	1.49	3.82	423.5	6.14	2.50	1.52	1.14	0.75	3.77	423.5	4.24	12	17371.3	0	85	124	69
202317471	Male	54	167	60	21.5139	4	4	4	4	4	4.2	1.17	2.99	505.1	4.74	0.83	1.37	0.99	0.722628	3.49	505.1	4.35	11	13865.7	0	74	121	87
202317466	Female	69	165	94	34.5271	4	4	4	5	4	4.2	1.17	3.12	251.8	5.17	2.55	1.33	1.07	0.804511	4.00	251.8	4.59	11	10197.7	0	82	136	72
202317464	Female	74	157	84	34.0785	4	4	4	5	4	4.2	1.00	1.64	26.9	3.27	1.70	1.37	0.48	0.350365	4.59	26.9	4.81	5	12463.8	0	72	121	62
202317321	Male	58	178	91	28.7211	4	4	4	4	5	4.2	1.14	3.58	621.0	5.81	2.74	1.24	1.41	1.1371	5.59	621.0	6.24	12	15524.1	0	79	132	83
202317151	Female	56	160	57	22.2656	3	4	4	5	5	4.2	1.38	2.06	102.1	4.11	1.14	1.41	0.57	0.404255	4.81	102.1	4.04	7	10529.6	0	80	138	66
202334740	Male	74	170	70	24.2215	4	4	4	5	5	4.4	1.60	2.73	102.2	4.69	0.812	1.52	0.77	0.506579	3.64	102.2	6.76	20	19715.1	1
202334475	Female	82	160	60	23.4375	4	4	4	5	5	4.4	1.84	3.23	264.1	5.64	0.716	1.58	0.95	0.601266	4.75	264.1	4.00	6	8413.76	0
202334138	Female	70	156	50	20.5457	4	4	4	5	5	4.4	1.39	3.45	50.8	5.07	1.222	1.38	1.03	0.746377	4.06	50.8	5.52	14	13715.3	0
202333091	Male	76	160	75	29.2969	4	4	4	5	5	4.4	1.07	1.39	61.5	2.94	1.153	1.19	0.43	0.361345	3.71	61.5	5.94	9	11792.2	0
202333015	Female	86	161	42	16.2031	4	5	5	4	4	4.4	1.51	2.38	45.6	4.68	1.679	1.59	0.77	0.484277	4.03	45.6	4.27	10	11706.3	0
202332810	Female	72	168	56	19.8413	5	4	4	4	5	4.4	1.61	4.62	450.9	6.52	1.088	1.37	1.47	1.07299	4.41	450.9	4.39	9	10742.2	0
202332703	Female	53	175	75	24.4898	4	4	5	5	4	4.4	1.26	2.34	460.7	3.82	0.916	1.38	0.60	0.434783	2.55	460.7	4.46	3	6494.32	0
202332175	Male	81	165	67	24.6097	4	4	5	5	4	4.4	1.15	2.50	204.0	3.99	1.314	1.30	0.83	0.638462	2.91	204.0	4.82	16	20767.9	0
202331114	Female	73	162	62	23.6244	4	4	4	5	5	4.4	1.57	3.98	308.5	6.18	2.260	1.56	1.44	0.923077	4.08	308.5	5.57	7	15358.3	0
202330805	Female	70	159	60	23.7332	4	5	5	3	5	4.4	1.12	2.37	34.8	3.83	1.243	1.30	0.73	0.561538	3.27	34.8	5.35	7	9526.35	0
202329407	Female	69	151	50	21.9289	4	5	4	4	5	4.4	1.25	1.41	300.2	2.97	0.925	1.21	0.42	0.347107	2.59	300.2	4.39	9	12133.9	0		123	77
202329221	Female	73	150	64	28.4444	4	4	4	5	5	4.4	1.35	3.32	182.6	5.12	1.385	1.46	1.05	0.719178	4.00	182.6	5.62	14	13106	0	70	110	78
202326730	Female	61	155	52	21.6441	4	4	5	4	5	4.4	1.12	2.32	35.1	3.85	1.363	1.27	0.69	0.543307	4.80	35.1	5.65	15	17949.8	0	82	163	61
202325897	Female	81	150	50	22.2222	4	4	5	4	5	4.4	1.91	2.73	167.9	5.17	1.171	1.82	0.77	0.423077	4.35	167.9	NORMAL	6	7756.59	0	83	137	89
202325202	Female	60	158	54	21.6311	4	5	4	4	5	4.4	1.32	1.40	299.7	3.06	1.177	1.34	0.43	0.320896	3.78	299.7	4.65	20	16915.8	0	82	134	72
202318182	Male	50	179	75	23.4075	4	4	4	5	5	4.4	1.27	2.84	43.4	4.70	1.01	1.27	0.74	0.582677	3.68	43.4	4.49	7	8518.74	0	95	135	61
202317248	Male	60	173	80	26.7299	4	4	4	5	5	4.4	1.22	5.74	137.0	8.03	2.05	1.05	1.89	1.8	3.86	137.0	4.32	8	14425.2	0	81	114	84
202317092	Male	74	170	65	22.4913	4	4	4	5	5	4.4	1.79	2.38	275.9	4.80	0.74	1.51	0.77	0.509934	4.88	275.9	4.33	13	20083.6	0	92	155	118
202317056	Female	75	156	50	20.5457	4	5	4	4	5	4.4	1.20	2.30	1182.6	4.16	0.96	1.35	0.71	0.525926	1.54	1182.6	4.46	7	10291.4	0	73	139	76
202316958	Male	70	162	70	26.6728	4	5	4	4	4	4.4	1.27	3.34	264.3	5.89	2.95	1.32	1.26	0.954545	6.87	264.3	5.53	8	13314.4	0	89	177	64
202316956	Male	60	185	85	24.8356	4	4	4	4	4	4.4	1.15	2.98	11.6	4.89	2.92	1.33	1.02	0.766917	4.77	11.6	4+ OVER	9	10637.9	0	90	167	56
202316947	Female	67	157	53	21.5019	4	4	4	4	5	4.4	1.69	4.28	1231.8	6.71	1.37	1.53	1.39	0.908497	4.31	1231.8	4.88	8	10898.5	0	96	160	80
202316888	Male	82	158	52	20.83	4	4	4	4	5	4.4	1.66	3.54	251.9	5.93	1.03	1.52	0.99	0.651316	2.59	251.9	4+ OVER	14	12460.9	0	64	118	71
202316776	Male	33	191	100	27.4115	4	4	3	4	3	4.4	1.19	3.55	130.6	5.47	1.70	1.17	1.08	0.923077	3.81	130.6	4.51	6	8505.83	0	82	134	83
202316773	Female	55	160	55	21.4844	3	3	4	4	4	4.4	1.02	1.95	523.4	4.05	2.32	1.10	0.73	0.663636	5.59	523.4	4.67	13	15989	0	84	119	87
202316758	Male	71	175	70	22.8571	4	4	4	5	5	4.4	1.00	1.17	161.3	2.42	0.66	1.10	0.32	0.290909	2.77	161.3	NORMAL	7	8175.3	0	75	140	75
202316744	Female	70	155	60	24.974	4	4	3	3	4	4.4	1.49	2.04	164.6	4.09	1.70	1.49	0.58	0.389262	2.76	164.6	7.19	6	7314.96	0	82	118	84
202311442	Female	67	146	60	28.1479	3	4	5	5	5	4.4	0.89	2.14	87.3	3.75	2.97	1.21	1.19	0.983471	3.61	87.3	NORMAL	9	9648.57	0	88	154	82
202334817	Female	77	155	72	29.9688	4	4	5	5	5	4.6	1.16	2.94	138.2	4.60	2.127	1.40	1.01	0.721429	3.99	138.2	6.45	10	11125.9	0
202332517	Female	76	160	68	26.5625	5	4	4	5	5	4.6	1.12	2.89	132.0	4.52	1.621	1.25	0.88	0.704	3.88	132.0	5.03	7	11716.4	0
202325742	Male	67	176	80	25.8264	4	4	5	5	5	4.6	0.98	3.87	91.7	5.46	2.030	1.20	1.35	1.125	3.67	91.7	6.72	15	14216	0	71	140	80
202318026	Female	68	160	59	23.0469	5	5	5	4	4	4.6	1.14	3.00	212.0	4.86	1.54	1.24	1.04	0.83871	4.34	212.0	5.87	6	12240.9	0	89	139	95
202317064	Female	83	160	55	21.4844	4	5	5	5	4	4.6	1.04	2.80	51.2	4.66	1.66	1.10	0.87	0.790909	5.06	51.2	4.81	8	12614.5	0	58	105	74
202316402	Male	81	164	62	23.0518	4	4	4	4	4	4.6	1.40	2.87	102.8	4.90	0.79	1.40	0.86	0.614286	3.80	102.8	5.47	10	10370.6	0	103	182	89
202316389	Female	31	162	53	20.1951	3	3	3	4	4	4.6	1.29	2.68	61.1	4.59	1.25	1.33	0.69	0.518797	3.17	61.1	4.74	3	7350.77	0	74	116	74
202314147	Male	60	159	60	23.7332	2	2	2	4	4	4.6	1.50	5.15	521.2	7.70	1.63	1.38	1.35	0.978261	5.36	521.2	4.80	4	7681.61	0	88	131	79
202334142	Female	81	155	58	24.1415	5	5	5	5	4	4.8	1.19	2.54	467.3	3.99	0.737	1.24	0.78	0.629032	3.52	467.3	4.88	7	7447.19	1
202332930	Female	83	150	42	18.6667	4	5	5	5	5	4.8	1.20	3.29	92.1	5.66	3.230	1.19	1.12	0.941176	5.95	92.1	5.93	12	12283.1	0
202329141	Male	63	165	65	23.8751	5	5	5	4	5	4.8	1.05	2.04	221.2	3.46	1.496	1.24	0.64	0.516129	3.12	221.2	4.37	8	13443.9	0	79	113	79
202316670	Male	67	164	76	28.257	4	5	5	5	5	4.8	1.40	2.07	48.9	4.07	2.64	1.65	0.75	0.454545	3.92	48.9	4.62	17	16513.2	0	89	146	100
202226901	Male	50	170	50	17.301	3	4	3	3	3	4.8	1.47	3.77	107.9	5.75	1.13	1.36	0.91	0.669118	3.02	107.9	4.29	9	15088.4	0	78	132	70
202325214	Female	78	153	63	26.9127	5	5	5	5	5	5	0.98	3.25	145.7	4.73	1.238	1.11	0.99	0.891892	3.30	145.7	6.15	5	10909	0	66	137	79

## Sheet: 退变分数＜3
Registration number	Gender	Age	Height	Weight	BMI Index	LI/2	L2/3	L3/4	L4/5	L5/S1	Average degeneration score	High - density lipoprotein (HDL)	Low - density lipoprotein (LDL)	Lipoprotein(a) [Lp(a)]	Cholesterol	Triglyceride (TG)	Apolipoprotein A1 (ApoA1)	Apolipoprotein B (ApoB)	Apo B/Apo A1	Apolipoprotein E	Glucose	Length of hospital stay	Cost
202335344	Male	46	167	70	25.0995	1	1	2	3	4	2.2	1.76	2.94	203.2	5.29	1.351	1.58	0.89	0.563291	5.26	5.24	7	5638.2
202328143	Male	41	173	103	34.4148	2	2	2	2	3	2.2	0.97	4.06	235.4	5.33	1.650	1.10	1.19	1.08182	3.06	4.07	8	7642.43
202327170	Male	58	165	72	26.4463	2	2	2	2	3	2.2	1.37	3.58	124.0	5.30	2.165	1.42	1.05	0.739437	3.41	4.45	9	24433.7
202334888	Male	41	180	85	26.2346	1	1	3	3	4	2.4	0.95	2.24	187.8	4.12	2.367	1.07	0.60	0.560748	8.45	4.78	9	7675.34
202334467	Female	71	156	65	26.7094	4	4	4	4	4	2.4	0.97	1.99	134.8	3.49	2.727	1.24	0.72	0.580645	3.19	3.98	16	11045.1
202334126	Female	35	158	42	16.8242	2	2	2	3	3	2.4	1.07	1.74	463.7	3.22	1.089	1.21	0.56	0.46281	3.48	4.41	8	7742.38
202333979	Female	57	155	56	23.3091	2	1	2	3	4	2.4	1.25	3.42	40.2	5.01	1.702	1.32	1.13	0.856061	4.50	5.06	10	11802.6
202332437	Male	46	174	82	27.0842	2	2	2	3	3	2.4	0.99	3.15	453.2	4.53	2.482	1.05	1.15	1.09524	4.20	4.65	12	10407.5
202332074	Female	53	160	55	21.4844	2	2	3	2	3	2.4	1.15	3.24	47.7	4.67	1.745	1.24	0.97	0.782258	2.94	4.45	7	14420
202330406	Female	45	166	63	22.8625	2	2	1	3	4	2.4	1.47	3.07	95.3	4.99	0.973	1.42	0.89	0.626761	3.49	4.57	7	7511.31
202329488	Female	54	152	62	26.8352	2	2	2	3	3	2.4	1.52	4.36	441.5	6.47	1.781	1.39	1.37	0.985612	4.10	4.97	11	10176.6
202328828	Female	28	169	124	43.4158	2	2	2	2	4	2.4	1.10	3.41	100.8	4.78	1.081	1.22	1.02	0.836066	2.89	4.83	7	7279.27
202328521	Male	60	180	85	26.2346	2	3	2	3	2	2.4	1.11	3.29	99.4	4.92	1.836	1.13	1.06	0.938053	4.77	5.28	5	7332.05
202326925	Male	62	170	69	23.8754	2	2	3	3	2	2.4	1.20	3.01	680.2	4.63	1.275	1.22	0.90	0.737705	3.53	NORMAL	8	13221.8
202326732	Female	59	165	65	23.8751	3	2	2	3	2	2.4	0.98	2.68	44.1	4.46	2.360	1.17	0.96	0.820513	4.52	4.51	8	11246.7
202326575	Male	53	175	103	33.6327	2	2	2	3	3	2.4	1.03	3.60	158.3	5.46	3.535	1.18	1.32	1.11864	5.53	8.84	5	9206.33
202311923	Female	62	158	58	23.2335	2	2	3	2	3	2.4	1.03	2.50	106.4	4.40	2.89	1.36	1.19	0.875	4.24	4.98	5	8360.36
202334466	Male	32	171	74	25.3069	3	3	3	4	5	2.5	0.93	2.52	196.6	3.77	1.246	1.05	0.76	0.72381	3.48	4.49	9	8915.82
202333800	Female	52	155	65	27.0552	3	3	4	3	4	2.6	1.69	4.16	299.6	6.16	0.730	1.56	1.21	0.775641	4.20	4.99	11	10318.6
202333461	Male	53	182	80	24.1517	2	2	3	3	3	2.6	1.11	3.39	92.9	5.14	0.918	1.17	1.04	0.888889	2.57	5.17	8	7949.72
202333358	Male	64	171	85	29.0688	3	3	3	2	2	2.6	1.19	3.99	304.4	5.58	1.638	1.23	1.33	1.0813	3.63	4.63	6	6821.46
202333004	Male	49	165	60	22.0386	2	2	3	3	3	2.6	1.46	4.23	408.7	6.14	0.750	1.39	1.33	0.956835	3.00	5.01	8	10444.5
202332717	Female	59	160	60	23.4375	2	2	3	3	3	2.6	1.86	3.90	331.5	6.29	1.240	1.56	1.19	0.762821	5.17	4.41	9	7720.08
202331677	Female	62	160	70	27.3438	2	2	3	3	3	2.6	1.18	2.69	26.9	4.39	2.519	1.38	1.01	0.731884	3.79	7.66	9	20625.9
202331556	Male	50	170	61	21.1073	2	3	3	3	2	2.6	1.04	2.74	80.5	4.08	0.933	1.07	0.79	0.738318	4.87	5.51	11	8590.23
202330848	Male	36	180	112	34.5679	2	2	3	3	3	2.6	1.18	4.23	99.3	5.86	2.200	1.11	1.54	1.38739	4.71	4.56	10	9740.87
202329301	Male	52	175	75	24.4898	2	2	3	3	3	2.6	1.10	2.88	15.2	4.68	2.729	1.23	1.02	0.829268	3.59	4.57	6	6814.65
202328551	Female	49	148	52.5	23.9682	3	3	2	2	3	2.6	1.61	2.11	39.0	4.13	0.799	1.45	0.58	0.4	3.59	4.09	6	12052.1
202327910	Female	38	160	80	31.25	2	2	3	2	4	2.6	1.59	4.87	346.8	7.23	3.234	1.33	1.70	1.2782	8.40	9.61	11	9616.37
202327057	Male	49	165	61	22.4059	2	2	2	3	4	2.6	1.12	2.40	26.1	3.75	0.843	1.17	0.66	0.564103	2.58	4.48	9	8655.73
202327051	Female	55	163	61	22.9591	2	3	3	3	2	2.6	0.93	3.32	261.5	4.66	2.380	1.02	1.01	0.990196	3.98	4.79	7	14407.6
202224898	Male	63	无			1	2	2	3	5	2.6	1.03	2.04	32.5	3.96	1.47	1.13	0.62	0.548673	8.45	3.98	3	5412.93
202335103	Male	60	170	65	22.4913	3	3	2	2	4	2.8	1.46	2.54	70.5	4.36	0.942	1.43	0.71	0.496503	3.89	4.32	7	10721.1
202332652	Female	57	160	65	25.3906	2	2	3	4	3	2.8	1.29	3.26	100.9	4.93	1.340	1.30	0.91	0.7	4.43	4.40	7	9077.2
202332412	Male	52	180	80	24.6914	2	3	3	3	3	2.8	1.25	3.37	51.8	5.29	2.781	1.34	1.20	0.895522	4.68	5.75	8	8427.22
202332200	Male	58	178	91	28.7211	3	3	2	3	3	2.8	0.96	3.03	82.9	4.78	5.636	1.33	1.10	0.827068	4.67	5.86	15	11560.4
202331971	Female	60	158	67	26.8386	3	3	3	3	2	2.8	1.15	3.46	105.6	5.12	1.301	1.26	1.04	0.825397	5.39	5.43	10	14289.3
202331145	Female	61	160	60	23.4375	2	3	3	3	3	2.8	1.00	2.22	270.7	3.73	2.235	1.28	0.79	0.617188	3.94	4.40	8	10473.8
202330838	Female	42			#DIV/0!	3	2	3	3	3	2.8	1.01	1.90	126.1	3.19	0.748	1.18	0.56	0.474576	2.65	4.19	8	6446.91
202330375	Female	54	163	67	25.2174	3	3	3	3	2	2.8	1.23	2.66	35.9	4.34	2.607	1.43	0.77	0.538462	2.96	4.52	8	9964.27
202329413	Female	48	160	70	27.3438	2	2	3	3	4	2.8	1.39	2.65	490.7	4.40	1.064	1.47	0.71	0.482993	4.45	4.64	5	11141.1
202329368	Female	56	158	72	28.8415	3	3	3	2	3	2.8	1.54	2.68	55.3	4.61	1.546	1.75	0.70	0.4	3.50	5.89	7	12766.3
202328435	Female	59	168	52	18.424	3	4	4		3	2.8	1.05	1.65	580.8	3.01	1.090	1.18	0.52	0.440678	3.75	4.08	5	8036.05
202328126	Male	68	175	72.5	23.6735	3	3	3	2	3	2.8	1.38	2.36	162.7	3.91	1.109	1.47	0.71	0.482993	2.61	4.62	14	25147.8
202327060	Female	40	162	52	19.8141	2	2	3	3	4	2.8	1.25	2.67	185.0	4.20	0.786	1.14	0.66	0.578947	3.37	4.34	9	8649.89
202326974	Male	75	170	65	22.4913	3	3	3	3	2	2.8	1.17	2.70	60.5	4.24	1.360	1.22	0.82	0.672131	3.06	5.80	13	17249.3
202326880	Male	73	166	58	21.048	3	2	2	3	4	2.8	1.63	2.58	242.5	4.62	0.697	1.47	0.69	0.469388	4.75	4.14	8	8470.31
202326780	Female	65	155	55	22.8928	3	3	3	3	2	2.8	1.93	5.12	56.1	7.47	1.631	1.49	1.65	1.10738	4.19	4.65	7	16374.4
202326737	Male	35	178	85	26.8274	3	3	3	3	2	2.8	0.92	2.52	60.7	3.66	1.104	1.05	0.70	0.666667	3.09	4.51	10	14138.9
202326379	Male	60	164	72	26.7698	2	3	3	3	3	2.8	1.05	3.21	83.7	4.54	1.401	1.15	0.92	0.8	3.40	6.06	14	13617.6

## Sheet: 3≤退变分数＜4
Registration number	Gender	Age	Height	Weight	BMI Index	LI/2	L2/3	L3/4	L4/5	L5/S1	Average degeneration score	High - density lipoprotein (HDL)	Low - density lipoprotein (LDL)	Lipoprotein(a) [Lp(a)]	Cholesterol	Triglyceride (TG)	Apolipoprotein A1 (ApoA1)	Apolipoprotein B (ApoB)	Apo B/Apo A1	Apolipoprotein E	Glucose	Length of hospital stay	Cost	费用
202335236	Female	51	160	53	20.7031	2	2	3	3	5	3	1.21	3.16	193.2	4.92	1.386	1.16	0.96	0.827586	6.08	193.2	4.67	9	9043.46
202335064	Female	72	158	69	27.6398	3	3	3	3	3	3	1.19	2.00	45.5	3.52	1.251	1.37	0.59	0.430657	3.82	45.5	6.66	10	10449.8
202333456	Female	57	169	70	24.5089	3	3	4	3	2	3	1.17	3.16	306.0	5.16	1.884	1.27	1.16	0.913386	4.08	306.0	4.97	24	15288.3
202333354	Female	59	155	50	20.8117	3	3	3	3	3	3	1.01	2.38	387.3	3.98	1.202	1.11	0.77	0.693694	2.78	387.3	4.87	7	11929.8
202333347	Male	76	162	50	19.052	3	3	3	3	3	3	0.92	3.48	1154.6	4.86	0.811	0.92	1.13	1.22826	3.10	1154.6	4.47	3	4179.34
202333002	Female	72	165	62	22.7732	3	3	3	3	3	3	1.10	1.63	107.0	3.61	2.427	1.35	0.54	0.4	4.64	107.0	4.74	9	6802.59
202333000	Male	66	168	82	29.0533	3	3	3	3	3	3	0.87	1.98	31.8	3.23	1.299	1.01	0.63	0.623762	2.22	31.8	5.29	8	9490.97
202332394	Male	65	174	75	24.7721	3	3	3	3	3	3	1.22	3.78	88.3	5.34	1.514	1.22	1.24	1.01639	4.22	88.3	NORMAL	6	8564.43
202332225	Male	44	180	90	27.7778	2	2	3	4	4	3	0.97	2.92	282.2	4.33	1.613	1.13	0.88	0.778761	3.79	282.2	6.17	4	8080.5
202332199	Male	42	178	66	20.8307	3	2	3	3	4	3	1.11	3.24	234.0	4.81	2.069	1.18	1.01	0.855932	3.60	234.0	4.50	6	7430.57
202332043	Female	69	157	60	24.3418	3	3	3	3	3	3	1.00	3.33	113.9	4.70	1.227	1.32	1.03	0.780303	3.08	113.9	5.00	7	17247.7
202331829	Male	66	164	60	22.3081	3	3	3	3	3	3	1.11	2.87	182.6	4.33	1.549	1.24	0.93	0.75	3.71	182.6	5.26	6	7451.8
202331640	Male	58	170	65	22.4913	5	4	4	5	5	3	1.18	3.21	58.1	4.83	2.356	1.32	1.12	0.848485	4.38	58.1	4.76	5	7285.45
202331276	Female	58	156	60	24.6548	2	3	3	3	4	3	1.29	4.44	131.4	6.37	1.614	1.27	1.47	1.15748	4.21	131.4	4.94	5	8094.75
202331245	Female	55	166	65	23.5883	2	3	3	3	4	3	1.53	2.89	48.2	4.87	0.552	1.48	0.78	0.527027	3.67	48.2	4.72	7	9782.9
202331122	Male	53	174	65	21.4692	3	3	3	3	3	3	0.83	1.72	58.8	3.73	4.427	1.18	0.76	0.644068	4.24	58.8	5.01	9	9647.47
202330823	Male	78	164	75	27.8852	2	3	3	3	4	3	0.86	1.80	192.2	3.13	2.562	1.19	0.64	0.537815	3.76	192.2	4.63	10	10092.8
202330160	Female	66	157	60	24.3418	3	3	3	3	3	3	1.25	3.25	316.2	4.87	1.017	1.33	0.96	0.721805	3.93	316.2	4.44	8	11143.5
202329744	Male	51	178	64	20.1995	2	3	3	3	4	3	1.67	4.88	230.3	7.10	1.708	1.45	1.48	1.02069	3.99	230.3	NORMAL	6	11773.1
202329703	Female	45	153	55	23.4952	3	3	3	3	3	3	1.39	2.69	98.1	4.49	0.817	1.38	0.76	0.550725	4.51	98.1	4.43	7	9204.98
202329659	Male	66	173	74	24.7252	3	3	3	3	3	3	1.01	3.84	218.0	5.30	1.929	1.08	1.33	1.23148	3.13	218.0	19.96	11	14419.7
202329220	Male	62	173	83	27.7323	3	3	3	3	3	3	1.14	2.69	114.8	4.07	1.576	1.33	0.84	0.631579	2.74	114.8	5.58	8	8859.46
202328823	Female	68	158	56	22.4323	3	3	3	3	3	3	1.21	4.10	331.8	5.90	2.052	1.28	1.41	1.10156	4.65	331.8	7.96	9	15536.4
202328816	Male	55	162	65	24.7676	2	3	3	3	4	3	1.08	2.05	53.6	3.38	1.048	1.22	0.62	0.508197	2.74	53.6	4.59	11	11547.5
202328577	Male	79	178	75	23.6713	3	3	3	3	3	3	0.80	1.41	575.6	2.34	0.836	1.02	0.44	0.431373	2.15	575.6	5.22	7	10599.7
202328273	Male	35	181	79	24.114	3	3	3	2	4	3	1.15	2.52	54.0	3.99	0.905	1.21	0.75	0.619835	3.03	54.0	4.39	7	12084.6
202328142	Female	72	162	65	24.7676	3	3	3	3	3	3	0.71	2.22	124.8	3.12	0.821	0.95	0.67	0.705263	2.96	124.8	NORMAL	10	9784.78
202327899	Female	71	153	59	25.204	3	3	3	4	2	3	1.59	3.13	153.5	4.98	0.948	1.60	0.90	0.5625	3.68	153.5	5.29	11	13104.2
202326560	Female	56	168	67	23.7387	2	3	3	3	4	3	1.52	4.78	561.9	7.04	1.475	1.40	1.55	1.10714	4.22	561.9	5.25	8	8177.19
202326416	Male	62	175	80	26.1224	2	2	3	4	4	3	1.15	2.63	133.4	4.07	0.821	1.27	0.75	0.590551	2.32	133.4	4.19	4	8166.28
202316424	Female	71	157	58	23.5304	3	3	3	3	3	3	1.26	3.06	153.2	5.10	1.71	1.44	1.08	0.75	4.63	153.2	4.84	9	12286.1
202335396	Male	50	180	85	26.2346	3	3	3	4	3	3.2	0.87	2.56	739.1	4.16	2.16	1.13	1.08	0.955752	3.17	739.1	NORMAL	3	9119.33
202333441	Female	67	162	60	22.8624	3	3	4	4	2	3.2	1.32	2.00	141.3	3.85	1.173	1.42	0.58	0.408451	4.07	141.3	3.79	8	10322.5
202333158	Female	79	160	70	27.3438	3	3	3	3	4	3.2	1.32	2.33	1097.3	4.26	0.664	1.31	0.63	0.480916	4.04	1097.3	4.94	4	8246.93
202333099	Female	61	160	65	25.3906	3	3	3	3	4	3.2	1.28	2.10	244.0	4.11	2.745	1.40	0.73	0.521429	2.67	244.0	4.50	9	13658.6
202332500	Female	70	150	60	26.6667	3	3	3	4	3	3.2	0.87	2.01	127.1	3.21	1.315	1.06	0.64	0.603774	5.34	127.1	5.39	5	9276.81
202332496	Female	73	160	57	22.2656	3	3	4	3	3	3.2	1.18	2.72	130.0	4.74	2.658	1.29	1.12	0.868217	5.73	130.0	4.75	8	12756.5
202332392	Male	64	175	72	23.5102	3	3	3	3	4	3.2	0.86	3.20	110.7	4.43	1.630	0.95	1.07	1.12632	3.06	110.7	4.91	7	9312.22
202331244	Male	64	168	62	21.9671	4	3	3	3	3	3.2	1.00	2.40	53.5	4.29	2.696	1.17	0.92	0.786325	5.12	53.5	6.40	7	11677.2
202330747	Female	74	162	68	25.9107	3	3	4	3	3	3.2	1.54	2.98	300.5	5.00	1.821	1.50	0.89	0.593333	4.61	300.5	5.15	8	8591.35
202330578	Female	74	156	73	29.9967	4	4	4	4	4	3.2	1.15	2.53	44.9	4.41	1.977	1.30	0.81	0.623077	5.73	44.9	4.96	11	11309.1
202330573	Female	42	154	54	22.7694	3	3	3	4	2	3.2	1.98	1.84	23.7	4.43	0.611	1.65	0.53	0.321212	5.53	23.7	4.38	5	8271.18
202330572	Female	73	153	60	25.6312	2	3	3	3	3	3.2	0.97	2.94	85.6	4.36	1.761	1.14	0.90	0.789474	3.62	85.6	5.61	14	13122.1
202330360	Male	65	168	70	24.8016	3	2	4	4	3	3.2	2.01	4.90	26.3	8.07	3.719	1.81	1.77	0.977901	5.89	26.3	7.13	6	7297.08
202330253	Female	50	158	55	22.0317	3	3	3	3	4	3.2	1.26	2.40	63.5	3.95	0.720	1.32	0.68	0.515152	5.04	63.5	4.93	9	12103.5
202330239	Female	77	163	53	19.9481	2	2	3	4	5	3.2	1.81	2.06	626.8	4.31	1.008	1.68	0.66	0.392857	4.37	626.8	4.83	8	13163.7
202328292	Male	78	168	65	23.03	3	4	3	3	3	3.2	1.02	3.36	812.8	4.92	1.630	1.13	1.15	1.0177	4.05	812.8	6.12	13	10853.8
202328150	Female	53	165	60	22.0386	3	3	3	3	4	3.2	1.23	2.60	62.8	4.18	1.291	1.38	0.77	0.557971	2.80	62.8	4.50	8	13769.3
202328075	Male	69	170	70	24.2215	3	2	4	4	3	3.2	1.19	2.50	254.4	3.95	0.761	1.33	0.71	0.533835	2.93	254.4	5.23	11	19464.7
202327931	Male	51	170	62	21.4533	3	3	3	4	3	3.2	0.98	3.10	395.2	4.32	0.999	1.11	0.91	0.81982	2.84	395.2	5.18	7	8844.16
202327055	Female	55	155	62	25.8065	3	3	3	3	4	3.2	1.49	3.38	81.7	5.68	2.250	1.39	1.14	0.820144	5.97	81.7	4.70	6	9103.61
202326911	Female	61	172	90	30.4218	3	3	3	4	3	3.2	1.72	5.11	201.6	7.40	1.350	1.37	1.66	1.21168	6.21	201.6	5.06	3	12527.2
202326747	Male	66	172	70	23.6614	3	3	3	4	3	3.2	1.07	2.73	64.8	4.14	2.021	1.17	0.81	0.692308	3.51	64.8	7.14	11	13003.4
202325867	Female	67	162	60	22.8624	3	3	3	3	4	3.2	1.00	3.02	586.3	4.66	2.454	1.22	1.11	0.909836	3.79	586.3	5.16	14	13383.5
202325543	Male	48	172	69.5	23.4924	3	3	3	3	4	3.2	1.03	2.46	249.0	3.80	1.112	1.23	0.75	0.609756	2.88	249.0	4.14	3	6676.18
202325332	Male	13	170	60	20.7612	3	3	3	3	4	3.2	1.42	2.97	70.2	4.78	1.537	1.35	0.76	0.562963	5.07	70.2	4.58	2	3373.29
202325193	Female	36	162	50	19.052	3	3	4	3	3	3.2	1.06	2.28	1012.8	3.63	0.700	1.04	0.62	0.596154	2.96	1012.8	4.60	12	10883.1
202318141	Female	53	149	60	27.0258	3	3	4	3	3	3.2	1.22	2.73	338.7	4.49	1.93	1.36	0.81	0.595588	4.55	338.7	4.09	15	14396.3
202312733	Male	50	180	85	26.2346	3	3	3	4	3	3.2	0.87	2.56	739.1	4.16	2.16	1.13	1.08	0.955752	3.17	739.1	NORMAL	3	9119.33
202330531	Female	61	170	68	23.5294	3	3	2	4	3	3.25	1.68	4.74	196.3	6.90	1.272	1.45	1.56	1.07586	5.68	196.3	4.58	12	11696.6
202330452	Female	28	160	100	39.0625	1	1	1	2	3	3.25	1.22	2.10	36.6	3.68	1.045	1.33	0.59	0.443609	6.83	36.6	5.41	13	10519.9
202335129	Female	50	159	53	20.9644	3	3	3	4	4	3.4	1.47	3.07	235.9	4.98	1.013	1.45	1.01	0.696552	3.50	235.9	4.58	8	5968.25
202334822	Female	50	164	61	22.68	3	3	4	4	3	3.4	1.46	2.58	109.6	4.37	0.610	1.38	0.68	0.492754	3.01	109.6	6.28	3	6230.34
202334820	Male	68	165	58	21.3039	3	3	4	4	3	3.4	0.90	3.11	102.2	4.33	1.197	1.02	1.05	1.02941	3.90	102.2	4.73	6	6460.08
202334284	Female	51	160	55	21.4844	3	3	3	4	4	3.4	1.82	3.90	112.1	6.06	0.832	1.55	1.04	0.670968	5.06	112.1	3.95	6	10129.7
202334129	Male	35	176	70	22.5981	3	3	3	5	3	3.4	1.73	1.76	51.5	3.85	0.916	1.54	0.57	0.37013	6.56	51.5	4.18	14	8416.75
202334119	Female	20	155	52	21.6441	3	3	3	4	4	3.4	1.12	3.41	568.4	5.13	3.489	1.18	1.19	1.00847	5.06	568.4	NORMAL	5	9896.16
202333779	Male	49	170	80	27.6817	3	3	3	4	4	3.4	1.15	3.17	147.1	4.80	1.527	1.24	1.01	0.814516	3.20	147.1	4.71	12	9817.82
202333346	Female	57	155	54	22.4766	3	4	4	3	3	3.4	1.66	4.95	347.4	7.33	1.522	1.37	1.50	1.09489	5.10	347.4	4.18	14	11547.4
202333180	Male	54	175	99	32.3265	3	3	4	3	4	3.4	0.83	2.55	170.8	3.96	1.580	1.03	0.84	0.815534	3.15	170.8	4.71	7	7218.95
202332630	Female	54	163	55	20.7008	3	4	3	3	4	3.4	1.13	4.07	103.3	6.03	2.604	1.05	1.59	1.51429	6.63	103.3	4.80	6	6544.43
202332579	Male	69	183	91	27.1731	3	3	3	4	4	3.4	1.06	2.50	51.8	4.02	2.567	1.34	0.82	0.61194	3.03	51.8	4.78	6	9658.03
202332511	Female	69	163	60	22.5827	3	4	3	3	4	3.4	1.86	2.59	59.2	4.99	1.545	2.06	0.74	0.359223	3.30	59.2	4.84	7	11140.2
202332296	Male	74	170	65	22.4913	3	3	4	4	3	3.4	1.13	3.35	99.7	4.93	1.591	1.24	1.09	0.879032	4.11	99.7	6.54	7	10635.1
202331936	Male	82	172	79	26.7036	4	3	3	3	4	3.4	0.77	2.18	48.6	3.26	1.448	1.05	0.75	0.714286	2.92	48.6	6.59	11	12757.3
202331846	Female	50	158	70	28.0404	3	3	3	4	4	3.4	1.03	2.13	109.9	3.50	1.766	1.22	0.71	0.581967	3.08	109.9	4.66	7	7077.14
202331243	Male	30	175	67	21.8776	4	3	3	3	4	3.4	1.20	3.69	17.5	5.35	1.164	1.15	1.06	0.921739	3.09	17.5	4.84	6	7950.87
202331066	Male	40	180	110	33.9506	3	3	3	4	4	3.4	1.07	2.97	420.7	4.50	1.046	1.19	0.91	0.764706	3.49	420.7	5.10	7	7779.41
202330966	Female	56	166	50	18.1449	3	3	4	4	3	3.4	1.81	2.70	93.4	5.11	1.052	1.73	0.76	0.439306	6.10	93.4	4.29	9	12757.1
202330792	Female	49	163	55	20.7008	2	3	4	4	4	3.4	1.09	2.05	186.3	3.46	1.274	1.25	0.63	0.504	3.07	186.3	4.08	6	8054.08
202330724	Female	58	160	71	27.7344	3	4	4	3	3	3.4	1.20	3.08	13.3	4.61	1.462	1.32	0.92	0.69697	3.80	13.3	4.71	5	11142.6
202330134	Female	71	170	82.5	28.5467	3	3	3	4	4	3.4	0.95	2.72	61.3	4.22	2.208	1.20	0.94	0.783333	4.16	61.3	4.69	8	10056.6
202329702	Female	47	158	70	28.0404	3	3	3	4	4	3.4	1.27	2.86	169.4	4.41	1.131	1.38	0.86	0.623188	4.34	169.4	5.70	16	11384
202329298	Female	67	158	80	32.0461	3	3	3	4	4	3.4	1.10	3.26	180.1	4.91	1.744	1.31	1.08	0.824427	3.46	180.1	6.18	12	9670.18
202329143	Female	74	152	55	23.8054	2	2	3	3	3	3.4	1.42	3.26	59.0	5.03	1.549	1.43	1.14	0.797203	4.67	59.0	6.51	10	12100.8
202329043	Female	80	156	65	26.7094	4	3	3	3	4	3.4	1.59	4.63	136.3	6.62	1.134	1.51	1.36	0.900662	4.10	136.3	10.83	5	12879.8
202329038	Female	27	158	80	32.0461	2	2	2	2	3	3.4	0.90	3.20	42.9	4.78	3.992	1.11	1.11	1	6.27	42.9	5.33	14	13737.5
202329032	Male	69	163	67	25.2174	3	4	5	5	5	3.4	1.19	3.54	472.8	5.09	1.240	1.22	1.18	0.967213	4.11	472.8	4.35	7	10526.1
202328982	Female	71	156	66	27.1203	4	4	4	4	5	3.4	1.05	2.85	551.4	4.33	1.325	1.24	0.81	0.653226	3.43	551.4	4.68	5	8332.05
202328973	Female	77	150	54	24	4	5	5	5	5	3.4	1.20	2.13	31.7	3.79	1.028	1.34	0.64	0.477612	2.78	31.7	2.99	10	12592.5
202328966	Female	76	157	52.5	21.299	4	3	3	4	5	3.4	1.09	2.42	65.2	3.94	1.553	1.24	0.73	0.58871	3.39	65.2	4.29	4	14477.1
202328855	Female	66	162	63	24.0055	3	3	3	3	3	3.4	1.14	3.38	22.4	4.96	1.781	1.15	1.05	0.913043	4.47	22.4	4.65	9	11595.3
202328366	Female	30	162	73	27.8159	3	3	3	4	4	3.4	1.05	3.64	206.6	4.91	1.059	1.19	1.02	0.857143	4.60	206.6	4.91	10	8029.81
202325990	Female	43	160	76	29.6875	3	3	3	4	4	3.4	0.90	2.21	212.9	3.51	1.956	1.24	0.67	0.540323	3.31	212.9	4.74	8	8574.7
202325878	Female	60	158	70	28.0404	3	3	3	4	4	3.4	1.33	2.76	607.0	4.90	1.940	1.48	0.93	0.628378	5.31	607.0	5.60	13	17011.2
202325715	Female	54	150	60	26.6667	3	3	4	4	3	3.4	1.02	2.68	16.9	4.20	2.348	1.20	0.88	0.733333	4.31	16.9	4.35	13	12218
202325258	Male	43	183	80	23.8884	3	3	3	4	4	3.4	1.08	3.92	67.5	5.81	2.411	1.06	1.24	1.16981	6.13	67.5	8.88	10	8977.22
202325212	Female	47	153	60	25.6312	3	3	3	4	4	3.4	1.31	1.61	92.9	3.71	1.606	1.34	0.50	0.373134	8.38	92.9	4.60	14	12684.2
202318491	Male	44	173	75	25.0593	3	3	3	4	4	3.4	1.60	3.60	46.4	6.08	2.68	1.58	1.15	0.727848	4.67	46.4	4.23	17	16407.5
202318412	Male	32	178	90	28.4055	3	3	3	4	4	3.4	0.81	2.62	23.8	3.98	1.56	1.00	0.82	0.82	3.30	23.8	4.19	16	16147.8
202317235	Male	46	173	73	24.3911	4	3	3	3	4	3.4	0.70	1.92	15.9	3.13	1.23	0.87	0.59	0.678161	3.14	15.9	4.91	7	15844.4
202335396	Male	35	180	95	29.321	3	3	3	5	4	3.6	1.02	3.13	141.1	4.50	1.415	1.10	0.97	0.881818	3.07	141.1	4.98	15	10707.1
202335233	Male	33	175	74	24.1633	3	3	4	4	4	3.6	1.45	4.51	162.8	6.77	2.958	1.30	1.70	1.30769	6.90	162.8	4.69	7	6401.3
202335231	Female	47	158	49	19.6283	3	3	4	4	4	3.6	1.63	1.79	88.5	3.92	0.652	1.52	0.50	0.328947	3.50	88.5	3.76	2	5701.75
202334828	Female	66	160	51	19.9219	3	3	4	4	4	3.6	1.62	2.62	226.8	4.73	0.840	1.49	0.71	0.47651	7.05	226.8	4.22	11	13815.7
202334473	Female	37	178	75	23.6713	3	3	3	4	5	3.6	1.42	3.26	21.1	5.22	1.209	1.43	0.94	0.657343	4.01	21.1	4.11	6	5787.52
202334359	Male	70	170	71	24.5675	3	3	4	5	3	3.6	1.10	3.49	687.2	5.01	1.332	1.18	1.09	0.923729	2.89	687.2	4.69	10	11272.7
202333350	Female	54	162	60	22.8624	3	4	4	4	3	3.6	1.21	2.23	111.3	4.14	1.097	1.35	0.72	0.533333	6.12	111.3	3.87	8	10116.5
202333128	Female	58	158	60	24.0346	3	4	4	4	3	3.6	1.31	2.42	397.5	4.41	1.488	1.39	0.83	0.597122	3.40	397.5	4.58	4	6090.64
202332518	Female	72	154	58	24.4561	3	3	4	4	4	3.6	1.09	3.24	151.3	4.93	2.468	1.19	1.21	1.01681	4.52	151.3	6.20	15	13264.7
202331641	Female	63	161	54	20.8325	3	4	3	3	5	3.6	1.20	3.32	327.2	4.74	0.788	1.23	1.04	0.845528	3.00	327.2	6.56	13	13367.9
202330846	Male	74	168	55	19.487	3	3	3	4	5	3.6	1.04	1.93	19.5	3.34	1.218	1.20	0.59	0.491667	4.11	19.5	9.32	7	7320.94
202329624	Female	58	158	70	28.0404	4	3	3	4	4	3.6	1.64	4.36		6.39	1.833	1.52	1.40	0.921053	6.79		3.51	11	17015.9
202329394	Male	68	162	70	26.6728	4	4	3	4	3	3.6	1.62	3.40	29.8	5.47	1.957	1.57	0.99	0.630573	2.76	29.8	10.39	8	8877.99
202329349	Female	51	160	60	23.4375	4	4	3	4	3	3.6	1.33	3.31	646.4	4.98	0.850	1.34	0.94	0.701493	3.78	646.4	4.30	12	16284.9
202329224	Male	53	172	78	26.3656	4	4	4	3	3	3.6	0.90	2.23	163.9	3.31	1.066	1.07	0.66	0.616822	2.57	163.9	4.98	10	11649.4
202329185	Male	52	168	58	20.5499	3	3	3	4	5	3.6	1.16	3.53	49.0	4.98	1.024	1.29	1.05	0.813953	3.22	49.0	4.43	7	8554.33
202328697	Male	54	165	70	25.7117	3	4	4	4	3	3.6	1.00	3.53	404.2	5.02	2.851	1.10	1.30	1.18182	3.90	404.2	7.29	4	8104.04
202328334	Female	72	151	65	28.5075	4	4	4	3	3	3.6	1.17	3.55	35.4	5.42	2.807	1.34	1.37	1.02239	5.38	35.4	5.51	6	12982.8
202328329	Female	54	155	56	23.3091	3	3	5	3	4	3.6	1.28	3.25	607.1	4.95	1.292	1.37	0.93	0.678832	2.76	607.1	5.01	5	4794.82
202328102	Female	41	168	62.5	22.1443	2	3	3	5	5	3.6	1.34	3.53	580.2	5.34	1.451	1.37	1.13	0.824818	4.23	580.2	4.59	8	13871.4
202327923	Male	65	176	62	20.0155	3	4	4	4	3	3.6	1.59	2.88	184.2	4.84	1.142	1.50	0.81	0.54	3.05	184.2	5.12	9	8603.36
202327860	Male	80	165	60	22.0386	3	3	3	3	3	3.6	0.81	2.32	28.7	3.56	1.538	1.01	0.68	0.673267	4.61	28.7	5.48	24	20011.4
202327857	Female	73	150	45	20	3	3	3	3	3	3.6	1.65	2.23	31.6	4.33	1.184	1.53	0.63	0.411765	4.74	31.6	4.31	21	18705
202327776	Male	43	170	70	24.2215	2	2	2	2	2	3.6	1.02	4.54	125.2	6.06	1.377	1.09	1.50	1.37615	3.51	125.2	5.37	9	8588.73
202327762	Male	84	162	60	22.8624	4	3	4	4	5	3.6	1.30	3.05	61.0	4.81	0.851	1.27	0.88	0.692913	4.90	61.0	7.21	7	11257.7
202327732	Female	81	148	54	24.653	4	4	5	4	4	3.6	1.15	2.40		4.10	1.699	1.32	0.82	0.621212				13	15981.1
202327571	Male	67			#DIV/0!	3	3	3	3	3	3.6	1.02	3.46	311.1	5.16	1.855	1.16	1.11	0.956897	4.80	311.1	5.03	11	29723.2
202327482	Male	62	170	72	24.9135	3	3	4	4	5	3.6	0.90	2.54	80.2	3.87	1.796	1.06	0.85	0.801887	3.64	80.2	5.98	12	12135
202327336	Male	43	165	71	26.079	2	2	2	2	3	3.6	1.09	3.49	601.3	4.98	2.078	1.17	1.20	1.02564	3.49	601.3	5.33	4	6670.22
202327303	Female	49	160	65	25.3906	3	4	4	4	5	3.6	1.02	2.28	36.2	4.95	5.332	1.20	0.96	0.8	6.76	36.2	4.15	5	10928.6
202327248	Female	37	166	67	24.3141	3	2	4	4	5	3.6	1.01	3.53	50.8	5.24	2.481	1.02	1.28	1.2549	4.41	50.8	4.28	9	8962.43
202327003	Male	59	174	90	29.7265	3	3	4	4	4	3.6	1.05	2.33	51.4	3.71	2.083	1.21	0.75	0.619835	3.56	51.4	4.72	7	11073.8
202326306	Female	68	153	56	23.9224	4	4	4	3	3	3.6	1.47	2.89	52.5	5.76	3.142	1.51	0.97	0.642384	7.13	52.5	6.30	7	13019.5
202326251	Female	64	158	60	24.0346	4	4	4	3	3	3.6	1.21	3.58	205.5	5.41	1.952	1.35	1.17	0.866667	4.00	205.5	5.87	13	12889.4
202325614	Female	67	155	50	20.8117	3	3	4	4	4	3.6	1.25	5.25	772.8	7.05	1.078	1.16	1.59	1.37069	4.22	772.8	4.15	9	10218.7
202325325	Female	69	157	47	19.0677	3	4	3	4	4	3.6	1.32	3.00	453.3	4.85	1.732	1.29	0.87	0.674419	2.92	453.3	4.89	16	15793.2
202325205	Male	46	168	80	28.3447	3	4	3	4	4	3.6	1.04	2.37	102.8	4.22	2.536	1.15	0.83	0.721739	4.88	102.8	4.42	7	10625.3
202318576	Male	53	176	65	20.984	3	3	3	4	5	3.6	0.89	2.60	20.1	4.03	0.88	1.04	0.75	0.721154	4.54	20.1	4.86	4	5011.12
202317229	Male	25	168	53	18.7783	3	3	4	4	4	3.6	1.10	1.93	61.3	3.53	0.98	1.16	0.54	0.465517	2.52	61.3	5.16	3	10372.6
202317223	Female	32	160	50	19.5312	4	3	3	4	4	3.6	1.04	3.02	172.1	4.57	0.63	1.08	0.76	0.703704	2.40	172.1	3.86	12	12805.6
202308136	Male	54	180	100	30.8642	2	3	4	4	5	3.6	1.26	4.37	70.0	6.37	5.25	1.34	1.97	1.47015	6.52	70.0	8.88	11	12210.6
202334614	Male	61	170	80	27.6817	4	3	4	4	4	3.8	1.05	3.16	34.3	5.12	4.020	1.27	1.12	0.88189	6.94	34.3	4.77	7	7383.5
202334586	Female	55	153	56	23.9224	3	4	4	4	4	3.8	1.58	4.86	107.3	6.94	2.627	1.49	1.64	1.10067	5.41	107.3	4.46	13	14477
202334146	Male	47	176	80	25.8264	4	3	4	4	4	3.8	0.99	3.22	24.2	5.65	4.795	1.12	1.25	1.11607	7.46	24.2	5.06	10	7659.02
202334097	Male	69	158	61	24.4352	4	4	4	4	3	3.8	1.22	2.74	222.4	4.35	1.671	1.37	0.91	0.664234	3.89	222.4	7.04	14	13569.7
202332453	Female	76	155	70	29.1363	4	5	4	3	3	3.8	1.08	3.40	297.3	5.14	2.056	1.17	1.19	1.01709	4.80	297.3	6.48	12	21491.5
202332425	Female	76	168	72	25.5102	4	3	4	4	4	3.8	1.42	3.65	119.7	5.69	2.680	1.45	1.25	0.862069	5.06	119.7	4.90	7	7605.98
202332401	Male	61	180	90	27.7778	3	3	4	4	5	3.8	1.19	3.51	214.5	4.99	1.380	1.25	1.23	0.984	3.82	214.5	4.96	7	9579.51
202332269	Female	68	165	50	18.3655	4	3	4	4	4	3.8	1.72	3.85	334.6	6.27	1.641	1.52	1.26	0.828947	4.23	334.6	7.94	7	12243.9
202330241	Female	74	158	71	28.441	4	4	4	3	4	3.8	1.28	4.16	490.1	5.74	1.778	1.19	1.32	1.10924	3.55	490.1	4.77	8	6746.85
202330091	Female	87	160	55	21.4844	4	4	3	4	4	3.8	1.38	3.47	357.9	5.78	2.247	1.36	1.24	0.911765	6.43	357.9	4.59	11	20171
202329707	Female	75	155	61	25.3902	4	4	4	4	3	3.8	1.15	3.56	182.1	5.13	1.024	1.21	1.14	0.942149	3.80	182.1	4.40	16	14141.8
202329202	Female	59	156	60	24.6548	3	3	4	4	5	3.8	1.41	3.37	82.6	5.36	1.770	1.48	1.00	0.675676	4.85	82.6	4.36	13	12182.6
202328037	Male	84	170	60	20.7612	3	4	4	4	4	3.8	1.05	3.70	609.0	5.06	0.832	1.07	1.10	1.02804	2.93	609.0	9.42	11	14665.3
202326764	Male	81	165	67.5	24.7934	3	4	4	4	4	3.8	1.05	2.35	127.3	3.73	1.111	1.16	0.66	0.568966	2.77	127.3	4.46	9	9923.4
202326399	Female	52	160	108	42.1875	4	4	4	4	3	3.8	1.27	3.83	202.0	5.65	2.700	1.39	1.38	0.992806	4.35	202.0	6.72	7	9847.97
202326202	Female	44	166	82	29.7576	3	3	3	4	4	3.8	0.84	2.24	109.8	4.02	4.066	1.19	0.93	0.781513	5.44	109.8	4.72	13	10326.8
202326198	Male	70	155	75	31.2175	3	4	5	5	3	3.8	0.93	3.10	103.5	4.60	1.802	1.21	1.08	0.892562	3.45	103.5	4.96	3	6772.72
202326186	Female	46	163	60	22.5827	3	3	3	4	4	3.8	1.20	3.13	153.8	4.73	1.073	1.27	0.89	0.700787	3.56	153.8	5.07	13	8763.77
202326151	Female	57	158	63	25.2363	5	4	4	4	4	3.8	1.36	4.78	159.1	6.69	1.918	1.41	1.57	1.11348	4.40	159.1	4.50	5	8665.95
202326123	Female	71	160	78	30.4688	5	5	4	4	4	3.8	1.68	2.79	104.4	5.19	1.621	1.86	0.88	0.473118	6.45	104.4	6.20	11	20428.9
202326122	Male	67	163	60	22.5827	5	5	4	4	4	3.8	1.15	2.76	356.5	4.80	2.571	1.36	1.07	0.786765	5.40	356.5	5.18	4	7161.32
202326103	Female	63	160	80	31.25	5	5	3	4	4	3.8	1.11	3.28	66.9	5.28	3.003	1.27	1.11	0.874016	5.01	66.9	4.86	11	11021.4
202326093	Female	36	163	95	35.756	3	3	3	3	4	3.8	1.18	3.69	200.0	5.62	3.280	1.30	1.40	1.07692	7.25	200.0	5.23	13	9693.29
202326054	Male	58	168	60	21.2585	5	5	5	4	4	3.8	0.99	2.61	178.6	4.11	2.044	1.25	0.90	0.72	2.24	178.6	4.37	7	13486.5
202326003	Female	77	160	80	31.25	5	5	5	4	5	3.8	1.14	3.72	31.3	5.35	1.683	1.30	1.12	0.861538	3.62	31.3	5.05	11	9557.19
202325945	Female	54	165	60	22.0386	3	4	3	4	5	3.8	2.02	2.47	372.4	5.18	0.822	1.78	0.67	0.376404	5.87	372.4	4.34	5	6290.72
202325562	Male	74	170	70	24.2215	4	3	4	4	4	3.8	1.15	3.17	107.6	5.11	2.696	1.27	1.17	0.92126	6.45	107.6	NORMAL	14	17484.6
202325530	Female	66	157	65	26.3702	3	3	4	4	5	3.8	1.17	2.92	100.6	4.57	1.554	1.29	0.87	0.674419	4.41	100.6	4.71	10	10581.4
202325335	Male	68	168	72.5	25.6874	3	4	4	5	3	3.8	1.10	2.79	136.8	4.36	2.052	1.20	0.92	0.766667	3.83	136.8	4.40	11	10510.9
202325186	Female	58	160	50	19.5312	4	3	4	4	4	3.8	1.00	2.59	368.5	4.00	1.545	1.13	0.81	0.716814	3.29	368.5	4.55	10	17295.2
202318528	Male	52	163	66	24.841	4	4	4	4	3	3.8	1.11	2.48	729.2	4.03	0.72	1.15	0.69	0.6	4.69	729.2	5.27	17	14233.5
202317399	Female	34	164	63	23.4236	3	3	4	4	5	3.8	1.22	2.48	90.2	4.17	0.44	1.20	0.68	0.566667	2.72	90.2	4.34	5	15105
202317323	Male	57	170	60	20.7612	4	4	4	4	3	3.8	0.99	2.29	29.8	3.82	1.50	1.17	0.76	0.649573	2.80	29.8	4.35	12	14999
202317156	Male	53	170	80	27.6817	3	3	4	4	5	3.8	0.99	2.68	152.6	4.26	1.78	1.20	0.82	0.683333	2.95	152.6	4.86	7	8583.82
202317091	Male	84	160	65	25.3906	4	3	4	4	4	3.8	0.95	2.95	172.0	4.45	1.02	1.11	0.96	0.864865	3.01	172.0	4.69	11	15495.2
202316436	Female	57	160	64	25	3	4	4	4	4	3.8	1.25	3.01	105.0	4.80	0.99	1.33	0.85	0.639098	3.23	105.0	4.96	8	8690.94
202306819	Female	74	154	60	25.2994	2	3	4	5	5	3.8	1.44	4.68	59.3	5.99	1.33	1.61	1.28	0.795031	4.31	59.3	4.96	13	16912

## Sheet: 4≤退变分数≤5
Registration number	Gender	Age	Height	Weight	BMI Index	LI/2	L2/3	L3/4	L4/5	L5/S1	Average degeneration score	High - density lipoprotein (HDL)	Low - density lipoprotein (LDL)	Lipoprotein(a) [Lp(a)]	Cholesterol	Triglyceride (TG)	Apolipoprotein A1 (ApoA1)	Apolipoprotein B (ApoB)	Apo B/Apo A1	Apolipoprotein E	Glucose	Length of hospital stay	Cost	费用
202334424	Female	54	156	67	27.5312	5	4	3	4	4	4	1.51	4.13	274.1	6.13	1.268	1.44	1.24	0.861111	3.79	274.1	4.15	7	7197.19
202333452	Female	71	160	75	29.2969	4	4	4	4	4	4	1.02	2.49	158.4	4.15	2.000	1.18	0.85	0.720339	2.96	158.4	7.30	9	12355.8
202333086	Female	67	158	45	18.026	4	4	4	4	4	4	1.41	2.27	422.9	4.27	0.648	1.29	0.64	0.496124	3.65	422.9	4.16	11	10775.1
202332753	Male	76	160	67	26.1719	4	4	4	4	4	4	0.92	2.78	137.3	4.07	1.668	1.09	0.89	0.816514	3.50	137.3	5.06	8	8770.51
202332275	Male	75	164	58	21.5645	3	4	4	4	5	4	1.02	2.64	655.6	3.79	0.651	1.12	0.76	0.678571	3.36	655.6	5.45	13	9618.89
202331554	Female	66	167	75	26.8923	3	4	4	4	5	4	1.09	1.66	253.2	2.95	0.565	1.20	0.51	0.425	3.90	253.2	5.14	13	15655.2
202331130	Male	80	165	45	16.5289	3	4	4	4	5	4	1.80	2.70	46.9	5.07	0.841	1.61	0.78	0.484472	3.75	46.9	NORMAL	7	12070.9
202331118	Female	62	157	51	20.6905	4	5	4	4	3	4	1.49	1.90	133.5	3.84	0.684	1.50	0.56	0.373333	3.28	133.5	3.49	3	6151.3
202331015	Male	81	181	85	25.9455	4	4	4	4	4	4	0.69	1.31	226.3	2.15	0.711	0.94	0.41	0.43617	2.22	226.3	9.84	14	13547.2
202329646	Female	83	164	60	22.3081	3	4	4	5	4	4	1.35	2.85	191.3	4.50	0.763	1.35	0.80	0.592593	4.13	191.3	5.95	10	12684.8
202329233	Female	69	168	74	26.2188	4	4	4	4	4	4	1.16	3.26	45.9	4.78	1.630	1.35	1.03	0.762963	4.41	45.9	4.42	9	8019.66
202328764	Female	79	158	65	26.0375	4	4	4	4	4	4	1.40	3.00	117.1	4.78	1.377	1.51	0.94	0.622517	4.93	117.1	4.60	2	6865.2
202328210	Male	70	175	64	20.898	4	5	4	4	3	4	1.06	2.85	687.0	4.26	0.896	1.11	0.89	0.801802	2.89	687.0	5.23	11	8429.98
202327952	Female	76	160	60	23.4375	4	4	4	4	4	4	1.34	2.02	115.8	3.57	1.044	1.38	0.54	0.391304	4.19	115.8	8.43	12	11091.9
202327862	Female	72	158	65	26.0375	3	4	4	5	4	4	1.02	2.98	27.1	4.35	1.483	1.21	0.88	0.727273	3.82	27.1	5.57	13	14684.1
202327242	Female	66	155	53	22.0604	3	4	4	4	5	4	1.13	3.37	79.7	5.06	3.403	1.27	1.14	0.897638	4.30	79.7	5.32	5	8321.96
202327013	Female	78	156	62	25.4767	4	4	4	4	4	4	1.32	3.70	330.9	5.28	1.256	1.30	1.03	0.792308	3.22	330.9	7.41	8	10262.9
202325858	Female	74	153	44	18.7962	4	4	4	4	4	4	1.46	2.78	233.5	4.75	0.987	1.45	0.77	0.531034	4.04	233.5	3.89	15	14472.5
202325616	Female	71	167	80	28.6851	4	4	4	4	4	4	1.06	3.14	152.7	4.70	1.514	1.20	0.98	0.816667	3.59	152.7	5.14	14	22005.5
202325509	Female	55	165	56	20.5693	3	4	5	4	4	4	1.16	3.24	36.9	4.91	1.739	1.29	1.10	0.852713	3.23	36.9	4.80	14	13564.8
202325321	Male	79	186	92.5	26.7372	4	4	4	4	4	4	1.13	3.49	249.1	5.09	1.312	1.11	1.03	0.927928	3.43	249.1	6.57	10	11942
202325319	Male	65	178	70	22.0932	5	4	3	4	4	4	0.92	2.39	591.7	3.68	1.701	1.12	0.65	0.580357	2.76	591.7	7.33	8	9809.75
202325181	Male	57	177	83	26.493	4	4	4	4	4	4	0.92	2.47	158.8	3.80	2.030	1.10	0.78	0.709091	3.04	158.8	5.37	5	7521.92
202325098	Male	72	175	65	21.2245	4	3	4	4	4	4	0.69	2.60	398.0	3.55	0.928	0.73	0.80	1.09589	2.95	398.0	5.13	9	10082.9
202325082	Female	42	173	134	44.7726	2	2	2	2	3	4	0.95	1.68	51.5	2.97	1.778	1.22	0.59	0.483607	4.13	51.5	7.52	12	14751.3
202325081	Male	66	175	80	26.1224	3	3	2	3	5	4	1.07	3.92	61.5	5.54	1.494	1.02	1.32	1.29412	4.29	61.5	4.71	7	9921.86
202325077	Female	42	160	65	25.3906	2	2	3	3	2	4	1.00	3.45	27.4	4.86	0.829	0.99	0.98	0.989899	4.05	27.4	4.69	13	12753.9
202325062	Male	50	168	65	23.03	3	3	3	2	2	4	1.09	3.22	306.7	4.79	1.856	1.12	1.02	0.910714	3.37	306.7	4.59	9	8204.51
202324977	Male	73	169	52	18.2066	3	3	3	3	4	4	0.99	3.20	52.5	4.72	1.612	1.12	1.07	0.955357	2.95	52.5	4.89	6	8737.54
202324964	Female	35	162	100	38.1039	4	4	4	4	4	4	1.16	2.81	48.0	5.10	4.637	1.33	1.14	0.857143	7.06	48.0	6.14	12	9824.72
202324828	Male	89	175	70	22.8571	3	4	4	4	4	4	1.00	1.56	249.5	2.84	0.637	1.08	0.47	0.435185	3.71	249.5	4.71	8	10901.6
202324791	Female	66	162	100	38.1039	3	4	4	4	4	4	1.22	3.19	58.9	4.83	1.105	1.35	0.97	0.718519	3.44	58.9	5.30	8	8933.72
202324776	Female	66	160	60	23.4375	2	2	3	4	4	4	1.17	3.69	269.6	5.50	1.350	1.23	1.27	1.03252	4.85	269.6	6.09	14	14029.5
202324627	Female	69	150	48.2	21.4222	4	3	3	3	5	4	0.83	1.80	90.0	2.87	0.931	1.05	0.50	0.47619	2.32	90.0	NORMAL	9	8182.97
202324620	Female	70	166	70	25.4028	3	4	4	4	4	4	1.19	4.02	176.2	5.74	1.461	1.31	1.25	0.954198	3.79	176.2	4.94	11	15379.1
202324614	Female	75	155	61	25.3902	5	4	4	4	4	4	1.32	3.55	60.4	5.58	1.841	1.42	1.13	0.795775	3.87	60.4	4.81	15	14773.4
202324611	Female	60	156	65	26.7094	3	3	4	4	4	4	1.64	4.18	275.6	6.56	1.913	1.58	1.18	0.746835	4.76	275.6	4.39	7	8941.34
202324607	Female	81	150	56	24.8889	4	4	4	4	4	4	1.32	1.94	90.2	3.61	0.653	1.24	0.59	0.475806	3.90	90.2	5.03	11	13095.3
202324538	Female	78	158	56	22.4323	4	4	4	5	5	4	1.55	4.12	67.6	6.46	1.526	1.51	1.34	0.887417	5.34	67.6	5.16	8	11049.4
202324533	Male	68	168	70	24.8016	4	3	4	4	4	4	0.88	1.73	467.9	2.98	0.900	1.12	0.53	0.473214	3.81	467.9	4.39	5	10601.3
202324369	Male	70	173	77	25.7276	2	2	3	4	4	4	0.96	2.70	148.8	4.04	1.577	1.18	0.83	0.70339	3.37	148.8	7.14	11	12297.5
202324368	Male	50	167	65	23.3067	2	2	3	3	4	4	1.08	2.76	129.1	7.74	7.895	1.27	0.83	0.653543	14.75	129.1	6.26	6	11318.1
202325155	Male	69	168	65	23.03	3	4	5	3	3	4	1.13	3.27	149.7	5.11	2.244	1.23	1.02	0.829268	3.99	149.7	NORMAL	7	7521.15
202324366	Male	79	167	70	25.0995	3	3	4	4	3	4	1.00	1.88	138.6	3.12	0.913	1.20	0.55	0.458333	2.82	138.6	6.68	13	10674.7
202324267	Female	66	164	65	24.1672	3	4	3	4	3	4	1.46	1.87	390.5	3.73	1.138	1.45	0.52	0.358621	4.27	390.5	4.95	13	14103.7
202323072	Female	65	161	57	21.9899	3	4	4	4	5	4	1.47	3.71	71.6	5.85	0.866	1.50	1.09	0.726667	3.74	71.6	5.10	6	11224.6
202320619	Female	50	166	58	21.048	3	3	3	3	4	4	1.48	3.14	62.9	5.22	0.564	1.40	0.94	0.671429	3.59	62.9	4.48	12	15161.2
202319963	Female	68	168	70	24.8016	2	3	3	4	5	4	1.20	3.72	51.5	5.83	2.72	1.28	1.29	1.00781	5.06	51.5	5.39	11	12788.9
202318845	Male	50	170	81	28.0277	3	3	4	4	3	4	1.17	3.04	11.9	5.85	7.89	1.17	1.16	0.991453	2.97	11.9	7.86	11	14639.6
202318841	Female	71	154	57	24.0344	4	4	4	4	5	4	1.25	2.86	95.5	4.79	1.45	1.26	0.87	0.690476	3.67	95.5	4.45	9	13105.3
202318784	Male	57	165	62	22.7732	3	3	4	4	4	4	0.92	2.34	264.0	3.83	1.45	1.01	0.70	0.693069	3.32	264.0	5.56	11	9872.72
202318783	Male	67	176	70	22.5981	4	4	4	4	5	4	1.18	1.84	121.0	4.26	1.67	1.17	0.49	0.418803	7.96	121.0	4.53	10	10666.3
202318732	Female	81	154	45	18.9745	4	4	4	5	5	4	1.56	2.46	94.1	4.68	0.76	1.50	0.78	0.52	3.99	94.1	6.06	14	12064.1
202318706	Female	78	156	60	24.6548	4	4	4	4	5	4	1.19	3.13	393.9	4.97	1.67	1.41	0.91	0.64539	4.02	393.9	4.64	7	10512.4
202318704	Male	70	178	96	30.2992	4	4	5	5	5	4	0.81	1.91	52.3	3.30	2.75	1.14	0.67	0.587719	2.26	52.3	4.43	10	14830.2
202318694	Female	59	163	66	24.841	3	4	4	4	5	4	1.04	2.26	97.6	3.80	0.91	1.16	0.66	0.568966	3.64	97.6	NORMAL	12	11154.9
202318587	Male	70	160	70	27.3438	4	4	4	4	4	4	1.28	2.85	23.8	5.75	4.19	1.51	1.01	0.668874	7.01	23.8	9.49	3	9689.37
202318561	Male	74	168	69	24.4473	4	4	4	4	4	4	1.30	2.59	270.4	4.44	0.62	1.31	0.67	0.51145	3.62	270.4	4.72	3	10410.5
202318499	Female	62	161	75	28.9341	3	4	4	4	5	4	1.29	1.43	45.5	3.16	0.76	1.33	0.41	0.308271	3.44	45.5	5.13	12	12370.8
202318490	Female	71	158	60	24.0346	3	4	4	4	5	4	1.33	3.87	469.0	7.33	5.79	1.25	1.64	1.312	7.47	469.0	7.74	11	16615.7
202318483	Female	65	158	48	19.2277	4	4	4	4	4	4	1.45	3.61	303.9	5.91	0.90	1.39	0.97	0.697842	4.23	303.9	4.25	8	14201.7
202318462	Male	66	176	73	23.5666	4	3	4	4	5	4	0.79	3.26	219.4	4.58	1.09	0.97	0.97	1	3.39	219.4	4.98	8	8603.76
202318392	Female	63	160	55	21.4844	4	4	4	4	4	4	1.89	5.40	673.8	8.40	2.59	1.53	1.92	1.2549	7.87	673.8	4.42	6	8167.8
202318382	Female	49	164	70	26.0262	3	4	4	5	4	4	1.21	3.99	217.8	6.24	2.67	1.29	1.33	1.03101	5.63	217.8	NORMAL	8	11080.9
202318350	Female	61	162	54	20.5761	4	4	4	4	4	4	1.16	3.38	165.9	5.41	2.23	1.19	1.20	1.0084	4.18	165.9	4.33	9	9432.46
202318306	Male	54	169	64	22.4082	4	4	4	4	4	4	1.18	2.46	123.9	4.22	0.85	1.32	0.70	0.530303	3.05	123.9	9.58	8	12705.3
202318220	Female	70	156	65	26.7094	4	4	4	4	4	4	1.35	3.23	80.1	5.84	3.85	1.45	1.22	0.841379	5.55	80.1	5.12	9	13967.4
202318138	Female	70	163	68	25.5937	4	4	4	4	4	4	1.50	3.60	615.0	5.86	1.11	1.52	1.10	0.723684	5.35	615.0	5.31	14	13304
202318136	Female	66	156	50	20.5457	4	4	4	4	4	4	1.15	1.88	487.5	3.46	0.73	1.23	0.59	0.479675	5.50	487.5	3+ 28	9	12102.3
202318049	Male	71	168	60	21.2585	4	4	4	4	4	4	1.10	2.52	207.2	4.18	0.85	1.20	0.78	0.65	4.28	207.2	4.58	7	15239.6
202318025	Female	68	160	48	18.75	4	4	4	4	4	4	1.04	2.82	138.5	4.50	1.45	1.22	0.93	0.762295	4.86	138.5	4.89	26	23992.5
202317448	Female	75	160	65	25.3906	4	4	4	4	4	4	0.97	2.35	129.9	4.08	2.19	1.38	0.79	0.572464	5.57	129.9	6.34	11	18927.4
202317417	Female	57	160	57	22.2656	4	4	4	4	4	4	1.24	2.23	43.3	4.06	1.09	1.48	0.66	0.445946	3.15	43.3	4.37	5	12698
202317291	Female	71	165	65	23.8751	4	4	4	4	4	4	0.96	2.33	185.4	4.01	2.15	1.18	0.83	0.70339	3.23	185.4	5.64	14	13672
202317184	Female	70	156	50	20.5457	4	4	4	4	4	4	1.13	3.62	693.8	5.85	2.37	1.22	1.38	1.13115	3.94	693.8	4.96	13	14473.1
202317150	Female	58	160	61	23.8281	3	4	4	4	5	4	1.12	1.41	336.9	3.12	1.23	1.30	0.45	0.346154	3.99	336.9	4.47	7	8733.25
202316963	Female	75	151	58	25.4375	4	4	4	4	4	4	1.95	0.83	68.9	3.19	0.44	1.67	0.27	0.161677	4.87	68.9	4.57	25	32715.2
202316672	Male	39	170	90	31.1419	4	4	4	4	4	4	0.92	2.30	13.2	3.78	1.43	1.19	0.77	0.647059	2.77	13.2	4.23	9	8710.35
202316634	Female	72	171	80	27.3588	4	4	4	4	4	4	1.18	2.25	24.3	4.09	0.94	1.24	0.71	0.572581	2.72	24.3	3+ 28	10	10370
202334719	Female	59	169	70	24.5089	4	4	4	4	5	4.2	1.29	2.00	64.5	4.12	3.170	1.53	0.60	0.392157	5.86	64.5	4.88	5	8123.55
202334630	Male	52	178	65	20.5151	4	4	4	4	5	4.2	0.95	2.76	51.1	4.38	1.585	1.08	0.98	0.907407	4.93	51.1	6.16	7	7419.7
202334459	Male	53	170	71	24.5675	4	4	4	5	4	4.2	0.84	2.73	59.8	3.72	0.790	1.03	0.78	0.757282	2.69	59.8	4.75	24	14639.7
202334282	Female	69	156	45	18.4911	4	4	4	5	4	4.2	1.11	2.83	168.3	4.60	1.438	1.18	0.82	0.694915	4.39	168.3	4.22	6	8234.45
202333861	Female	84	155	51	21.2279	4	4	4	5	4	4.2	0.96	1.74	35.9	3.01	1.467	1.24	0.55	0.443548	2.92	35.9	4.32	25	16211.1
202333777	Male	70	165	70	25.7117	4	4	4	4	5	4.2	1.22	3.78	74.9	5.56	2.329	1.34	1.23	0.91791	3.93	74.9	5.06	11	9504.99
202333136	Female	74	无		#VALUE!	4	4	4	5	4	4.2	0.99	2.96	114.6	4.42	1.436	1.19	0.92	0.773109	3.78	114.6	4.97	7	9216.59
202331325	Female	82	156	55	22.6003	4	5	4	4	4	4.2	0.81	2.74	55.6	4.09	2.143	0.98	0.81	0.826531	3.36	55.6	4.46	7	7346.75
202331000	Male	77	181	80	24.4193	4	4	4	5	4	4.2	1.00	3.04	36.5	4.57	1.815	1.19	1.02	0.857143	3.81	36.5	8.05	7	9407.02
202330788	Male	68	178	90	28.4055	3	4	4	5	5	4.2	0.63	1.50	53.4	2.44	2.019	0.88	0.51	0.579545	2.51	53.4	6.31	10	10705.6
202330580	Female	81	160	60	23.4375	5	4	4	4	4	4.2	1.32	3.25	363.8	4.91	0.871	1.35	0.91	0.674074	4.01	363.8	5.13	3	8112.02
202329907	Female	67	158	70	28.0404	4	5	3	4	5	4.2	1.28	2.72	116.3	4.49	1.615	1.40	0.78	0.557143	3.66	116.3	4.43	9	19180.2
202329334	Male	72	170	76	26.2976	4	4	4	5	4	4.2	0.90	2.40	31.0	3.68	1.226	1.11	0.77	0.693694	3.47	31.0	4.73	6	7007.35
202329257	Female	52	158	65	26.0375	4	4	5	4	4	4.2	1.31	2.42	65.9	4.23	1.921	1.42	0.77	0.542254	5.21	65.9	4.00	12	16268
202328288	Male	70	170	65	22.4913	4	4	4	4	5	4.2	1.00	1.50	486.8	2.71	1.499	1.18	0.54	0.457627	2.73	486.8	4.79	14	15228.7
202328218	Female	64	162	64	24.3865	4	4	4	4	5	4.2	1.04	3.41	84.7	4.83	1.206	1.16	1.12	0.965517	3.17	84.7	4.62	4	12256.3
202328189	Male	66	170	78	26.9896	4	4	4	4	5	4.2	1.02	1.79	54.0	3.25	1.877	1.20	0.66	0.55	3.19	54.0	5.55	4	5633.75
202326576	Female	65	165	81	29.7521	4	4	4	4	5	4.2	1.30	3.28	250.5	5.11	2.137	1.41	1.04	0.737589	3.94	250.5	4.52	8	7697.11
202325572	Female	67	164	67	24.9108	4	5	4	4	4	4.2	1.08	2.35	198.0	4.15	1.897	1.38	0.71	0.514493	5.20	198.0	4.14	8	9787.85
202325548	Male	67	169	65	22.7583	4	4	5	4	4	4.2	0.83	1.89	482.4	3.12	1.691	1.11	0.62	0.558559	2.24	482.4	5.64	8	11581.3
202325270	Female	68	160	56	21.875	4	4	5	4	4	4.2	1.19	2.31	55.3	3.79	1.365	1.23	0.62	0.504065	4.86	55.3	4.43	11	9757.93
202318636	Female	83	150	54	24	4	4	4	4	5	4.2	0.97	3.06	95.9	4.67	1.56	1.07	0.98	0.915888	6.35	95.9	4.95	14	12801.1
202318498	Female	60	160	48	18.75	4	4	4	4	5	4.2	1.31	2.77	191.9	4.77	0.95	1.42	0.80	0.56338	3.72	191.9	4.15	7	10285.8
202318074	Male	76	174	70	23.1206	3	4	5	4	5	4.2	0.96	2.13	498.8	3.63	1.30	1.19	0.68	0.571429	3.08	498.8	6.52	12	20200.9
202318058	Female	65	152	62	26.8352	4	4	4	4	5	4.2	1.37	3.03	110.1	5.02	1.44	1.56	1.00	0.641026	3.64	110.1	5.49	10	10181
202317942	Male	63	167	70	25.0995	4	4	4	4	4	4.2	1.27	2.05	374.2	3.83	1.11	1.46	0.70	0.479452	3.45	374.2	5.38	10	10514.3
202317919	Female	68	161	62	23.9188	4	4	4	4	4	4.2	1.78	3.31	179.8	5.86	0.96	1.58	0.99	0.626582	4.88	179.8	4.48	13	12671.2
202317856	Female	82	156	65	26.7094	4	4	4	4	4	4.2	1.83	4.53	117.2	7.17	1.57	1.72	1.64	0.953488	5.54	117.2	9.17	13	13546.1
202317832	Female	49	160	60	23.4375	4	3	3	4	5	4.2	1.41	2.78	173.9	4.71	0.85	1.49	0.77	0.516779	3.19	173.9	4.97	16	17235.8
202317808	Female	50	158	60	24.0346	4	4	4	4	4	4.2	1.12	2.50	85.0	4.49	2.36	1.30	0.85	0.653846	5.15	85.0	5.36	15	22893.6
202317807	Male	59	168	70	24.8016	3	3	4	4	4	4.2	0.94	3.10	336.7	4.58	1.01	1.07	0.95	0.88785	3.62	336.7	4.37	12	15516.6
202317794	Female	49	163	66	24.841	4	4	3	4	4	4.2	1.32	2.30	40.9	4.06	0.62	1.37	0.66	0.481752	3.37	40.9	4.62	7	9585.82
202317771	Male	68	176	67	21.6296	4	3	4	4	4	4.2	1.59	3.39	28.4	5.67	1.05	1.56	0.98	0.628205	3.97	28.4	4.17	8	12311.7
202317645	Female	54	165	78	28.6501	4	4	4	4	4	4.2	1.09	2.78	86.1	4.62	2.02	1.22	0.90	0.737705	4.09	86.1	NORMAL	7	6317.83
202317624	Male	55	174	67	22.1297	4	4	4	5	4	4.2	0.72	1.81	152.3	2.97	0.91	0.87	0.55	0.632184	2.71	152.3	4.67	9	12750
202317601	Female	48	160	65	25.3906	4	4	4	4	5	4.2	1.18	3.80	932.7	5.63	1.13	1.27	1.14	0.897638	4.16	932.7	4.18	9	12049.5
202317514	Female	66	154	69	29.0943	4	4	4	4	5	4.2	1.22	3.00	127.6	4.95	2.03	1.55	1.00	0.645161	4.33	127.6	5.73	9	11701.9
202317493	Male	83	172	75	25.3515	4	4	4	5	5	4.2	0.87	3.08	368.4	4.60	1.50	1.05	1.12	1.06667	4.03	368.4	4.96	22	14820.5
202317482	Female	56	155	57	23.7253	3	3	4	4	3	4.2	1.49	3.82	423.5	6.14	2.50	1.52	1.14	0.75	3.77	423.5	4.24	12	17371.3
202317471	Male	54	167	60	21.5139	4	4	4	4	4	4.2	1.17	2.99	505.1	4.74	0.83	1.37	0.99	0.722628	3.49	505.1	4.35	11	13865.7
202317466	Female	69	165	94	34.5271	4	4	4	5	4	4.2	1.17	3.12	251.8	5.17	2.55	1.33	1.07	0.804511	4.00	251.8	4.59	11	10197.7
202317464	Female	74	157	84	34.0785	4	4	4	5	4	4.2	1.00	1.64	26.9	3.27	1.70	1.37	0.48	0.350365	4.59	26.9	4.81	5	12463.8
202317321	Male	58	178	91	28.7211	4	4	4	4	5	4.2	1.14	3.58	621.0	5.81	2.74	1.24	1.41	1.1371	5.59	621.0	6.24	12	15524.1
202317151	Female	56	160	57	22.2656	3	4	4	5	5	4.2	1.38	2.06	102.1	4.11	1.14	1.41	0.57	0.404255	4.81	102.1	4.04	7	10529.6
202334740	Male	74	170	70	24.2215	4	4	4	5	5	4.4	1.60	2.73	102.2	4.69	0.812	1.52	0.77	0.506579	3.64	102.2	6.76	20	19715.1
202334475	Female	82	160	60	23.4375	4	4	4	5	5	4.4	1.84	3.23	264.1	5.64	0.716	1.58	0.95	0.601266	4.75	264.1	4.00	6	8413.76
202334138	Female	70	156	50	20.5457	4	4	4	5	5	4.4	1.39	3.45	50.8	5.07	1.222	1.38	1.03	0.746377	4.06	50.8	5.52	14	13715.3
202333091	Male	76	160	75	29.2969	4	4	4	5	5	4.4	1.07	1.39	61.5	2.94	1.153	1.19	0.43	0.361345	3.71	61.5	5.94	9	11792.2
202333015	Female	86	161	42	16.2031	4	5	5	4	4	4.4	1.51	2.38	45.6	4.68	1.679	1.59	0.77	0.484277	4.03	45.6	4.27	10	11706.3
202332810	Female	72	168	56	19.8413	5	4	4	4	5	4.4	1.61	4.62	450.9	6.52	1.088	1.37	1.47	1.07299	4.41	450.9	4.39	9	10742.2
202332703	Female	53	175	75	24.4898	4	4	5	5	4	4.4	1.26	2.34	460.7	3.82	0.916	1.38	0.60	0.434783	2.55	460.7	4.46	3	6494.32
202332175	Male	81	165	67	24.6097	4	4	5	5	4	4.4	1.15	2.50	204.0	3.99	1.314	1.30	0.83	0.638462	2.91	204.0	4.82	16	20767.9
202331114	Female	73	162	62	23.6244	4	4	4	5	5	4.4	1.57	3.98	308.5	6.18	2.260	1.56	1.44	0.923077	4.08	308.5	5.57	7	15358.3
202330805	Female	70	159	60	23.7332	4	5	5	3	5	4.4	1.12	2.37	34.8	3.83	1.243	1.30	0.73	0.561538	3.27	34.8	5.35	7	9526.35
202329407	Female	69	151	50	21.9289	4	5	4	4	5	4.4	1.25	1.41	300.2	2.97	0.925	1.21	0.42	0.347107	2.59	300.2	4.39	9	12133.9
202329221	Female	73	150	64	28.4444	4	4	4	5	5	4.4	1.35	3.32	182.6	5.12	1.385	1.46	1.05	0.719178	4.00	182.6	5.62	14	13106
202326730	Female	61	155	52	21.6441	4	4	5	4	5	4.4	1.12	2.32	35.1	3.85	1.363	1.27	0.69	0.543307	4.80	35.1	5.65	15	17949.8
202325897	Female	81	150	50	22.2222	4	4	5	4	5	4.4	1.91	2.73	167.9	5.17	1.171	1.82	0.77	0.423077	4.35	167.9	NORMAL	6	7756.59
202325202	Female	60	158	54	21.6311	4	5	4	4	5	4.4	1.32	1.40	299.7	3.06	1.177	1.34	0.43	0.320896	3.78	299.7	4.65	20	16915.8
202318182	Male	50	179	75	23.4075	4	4	4	5	5	4.4	1.27	2.84	43.4	4.70	1.01	1.27	0.74	0.582677	3.68	43.4	4.49	7	8518.74
202317248	Male	60	173	80	26.7299	4	4	4	5	5	4.4	1.22	5.74	137.0	8.03	2.05	1.05	1.89	1.8	3.86	137.0	4.32	8	14425.2
202317092	Male	74	170	65	22.4913	4	4	4	5	5	4.4	1.79	2.38	275.9	4.80	0.74	1.51	0.77	0.509934	4.88	275.9	4.33	13	20083.6
202317056	Female	75	156	50	20.5457	4	5	4	4	5	4.4	1.20	2.30	1182.6	4.16	0.96	1.35	0.71	0.525926	1.54	1182.6	4.46	7	10291.4
202316958	Male	70	162	70	26.6728	4	5	4	4	4	4.4	1.27	3.34	264.3	5.89	2.95	1.32	1.26	0.954545	6.87	264.3	5.53	8	13314.4
202316956	Male	60	185	85	24.8356	4	4	4	4	4	4.4	1.15	2.98	11.6	4.89	2.92	1.33	1.02	0.766917	4.77	11.6	4+ OVER	9	10637.9
202316947	Female	67	157	53	21.5019	4	4	4	4	5	4.4	1.69	4.28	1231.8	6.71	1.37	1.53	1.39	0.908497	4.31	1231.8	4.88	8	10898.5
202316888	Male	82	158	52	20.83	4	4	4	4	5	4.4	1.66	3.54	251.9	5.93	1.03	1.52	0.99	0.651316	2.59	251.9	4+ OVER	14	12460.9
202316776	Male	33	191	100	27.4115	4	4	3	4	3	4.4	1.19	3.55	130.6	5.47	1.70	1.17	1.08	0.923077	3.81	130.6	4.51	6	8505.83
202316773	Female	55	160	55	21.4844	3	3	4	4	4	4.4	1.02	1.95	523.4	4.05	2.32	1.10	0.73	0.663636	5.59	523.4	4.67	13	15989
202316758	Male	71	175	70	22.8571	4	4	4	5	5	4.4	1.00	1.17	161.3	2.42	0.66	1.10	0.32	0.290909	2.77	161.3	NORMAL	7	8175.3
202316744	Female	70	155	60	24.974	4	4	3	3	4	4.4	1.49	2.04	164.6	4.09	1.70	1.49	0.58	0.389262	2.76	164.6	7.19	6	7314.96
202311442	Female	67	146	60	28.1479	3	4	5	5	5	4.4	0.89	2.14	87.3	3.75	2.97	1.21	1.19	0.983471	3.61	87.3	NORMAL	9	9648.57
202334817	Female	77	155	72	29.9688	4	4	5	5	5	4.6	1.16	2.94	138.2	4.60	2.127	1.40	1.01	0.721429	3.99	138.2	6.45	10	11125.9
202332517	Female	76	160	68	26.5625	5	4	4	5	5	4.6	1.12	2.89	132.0	4.52	1.621	1.25	0.88	0.704	3.88	132.0	5.03	7	11716.4
202325742	Male	67	176	80	25.8264	4	4	5	5	5	4.6	0.98	3.87	91.7	5.46	2.030	1.20	1.35	1.125	3.67	91.7	6.72	15	14216
202318026	Female	68	160	59	23.0469	5	5	5	4	4	4.6	1.14	3.00	212.0	4.86	1.54	1.24	1.04	0.83871	4.34	212.0	5.87	6	12240.9
202317064	Female	83	160	55	21.4844	4	5	5	5	4	4.6	1.04	2.80	51.2	4.66	1.66	1.10	0.87	0.790909	5.06	51.2	4.81	8	12614.5
202316402	Male	81	164	62	23.0518	4	4	4	4	4	4.6	1.40	2.87	102.8	4.90	0.79	1.40	0.86	0.614286	3.80	102.8	5.47	10	10370.6
202316389	Female	31	162	53	20.1951	3	3	3	4	4	4.6	1.29	2.68	61.1	4.59	1.25	1.33	0.69	0.518797	3.17	61.1	4.74	3	7350.77
202314147	Male	60	159	60	23.7332	2	2	2	4	4	4.6	1.50	5.15	521.2	7.70	1.63	1.38	1.35	0.978261	5.36	521.2	4.80	4	7681.61
202334142	Female	81	155	58	24.1415	5	5	5	5	4	4.8	1.19	2.54	467.3	3.99	0.737	1.24	0.78	0.629032	3.52	467.3	4.88	7	7447.19
202332930	Female	83	150	42	18.6667	4	5	5	5	5	4.8	1.20	3.29	92.1	5.66	3.230	1.19	1.12	0.941176	5.95	92.1	5.93	12	12283.1
202329141	Male	63	165	65	23.8751	5	5	5	4	5	4.8	1.05	2.04	221.2	3.46	1.496	1.24	0.64	0.516129	3.12	221.2	4.37	8	13443.9
202316670	Male	67	164	76	28.257	4	5	5	5	5	4.8	1.40	2.07	48.9	4.07	2.64	1.65	0.75	0.454545	3.92	48.9	4.62	17	16513.2
202226901	Male	50	170	50	17.301	3	4	3	3	3	4.8	1.47	3.77	107.9	5.75	1.13	1.36	0.91	0.669118	3.02	107.9	4.29	9	15088.4
202325214	Female	78	153	63	26.9127	5	5	5	5	5	5	0.98	3.25	145.7	4.73	1.238	1.11	0.99	0.891892	3.30	145.7	6.15	5	10909
